# Supplementary material for: Metal-free photocatalyzed allylic silylation of allyl acetates and chlorides
Source: Royal Society of Chemistry journal article supplement (doi:10.1039/d3qo01088k), 2023-01-01
Supplement: d3qo01088k1.pdf [file d3qo01088k1.pdf]

## **Supporting Information**

### **Metal-free photocatalyzed allylic silylation of allyl acetates and chlorides**

Xin-Long Yu,<sup>a</sup> Jia-Wei Hu,<sup>a</sup> Jian Cao<sup>\*a</sup> and Li-Wen Xu<sup>\*a,b</sup>

*<sup>a</sup>College of Material, Chemistry and Chemical Engineering, Key Laboratory of Organosilicon Chemistry and Material Technology of Ministry of Education, Key Laboratory of Organosilicon Material Technology of Zhejiang Province, Hangzhou Normal University, Hangzhou, 311121, Zhejiang, P. R. China*

*<sup>b</sup>Key Laboratory of Precise Synthesis of Functional Molecules of Zhejiang Province, School of Science, Westlake University, P. R. China*

*E-mail: [caojian@hznu.edu.cn](mailto:caojian@hznu.edu.cn); [liwenxu@hznu.edu.cn](mailto:liwenxu@hznu.edu.cn)*

| <b>Table of Contents</b>                        |         |
|-------------------------------------------------|---------|
| General information                             | S2      |
| Optimization of reaction conditions             | S3-S5   |
| Mechanistic Studies                             | S6-S7   |
| Synthesis of allylsilanes <b>3</b> and <b>5</b> | S8-S17  |
| Synthesis of <b>6</b> , <b>7</b> , <b>8</b>     | S18-S19 |
| References                                      | S20     |
| NMR spectra                                     | S21-S47 |
| Crystal data of <b>3m</b>                       | S48     |

## General information

Unless otherwise stated, all reactions were carried out under a nitrogen atmosphere in glass reaction tubes. All reagents were from commercial sources and used as received without further purification. All solvents were dried by standard techniques and distilled prior to use. Column chromatography was performed on silica gel (300-400 meshes) using petroleum ether (bp. 60~90 °C) and ethyl acetate as eluent. Precoated silica gel plates F-254 were used for thin-layer analytical chromatography and visualized by UV fluorescence (254 nm) then one of the following: KMnO<sub>4</sub>, phosphomolybdic acid. NMR spectra were recorded on a Bruker Avance (400 MHz) spectrometer, using CDCl<sub>3</sub> as the solvent and TMS as internal standard. Chemical shifts ( $\delta$ ) were reported in parts per million (ppm) relative to residual solvent peaks rounded to the nearest 0.01 for proton and 0.1 for carbon (*ref.* CHCl<sub>3</sub> <sup>1</sup>H: 7.26, <sup>13</sup>C: 77.16). Coupling constants (*J*) were reported in Hz to the nearest 0.1 Hz. Peak multiplicity was indicated as follows: s (singlet), d (doublet), t (triplet), q (quartet), dd (doublet of doublets), m (multiplet) and br (broad). High resolution mass spectrometry (HRMS) was performed on a Waters Micromass (ESI-TOF). Silacarboxylic acids,<sup>1</sup> allyl acetates,<sup>2</sup> and allyl chlorides<sup>3</sup> were synthesized according to reported procedures.

## Optimization of reaction conditions

**Table S1.** Screening of photocatalysts.<sup>a</sup>

$\text{1a} + \text{2a} \xrightarrow[\text{MeCN, r.t., 5 h, Blue LED (15 W)}]{\text{Photocatalyst (5 mol\%)}} \text{3a}$

| Entry          | Photocatalyst                                                 | Yield of <b>3a</b> (%) | <i>Z:E</i> <sup>b</sup> |
|----------------|---------------------------------------------------------------|------------------------|-------------------------|
| <b>1</b>       | <b>4CzIPN</b>                                                 | <b>85</b>              | <b>1:2</b>              |
| 2              | riboflavin                                                    | 80                     | 1:1.5                   |
| 3              | Eosin Y                                                       | 52                     | 1:1.6                   |
| 4 <sup>c</sup> | Ir[dF(CF <sub>3</sub> )ppy] <sub>2</sub> (bpy)PF <sub>6</sub> | 72                     | 1:1                     |

**4CzIPN**

**riboflavin**

**Eosin Y**

**Ir[dF(CF<sub>3</sub>)ppy]<sub>2</sub>(bpy)PF<sub>6</sub>**

<sup>a</sup> Reaction conditions: **1a** (0.2 mmol, 1.0 equiv.), **2a** (0.2 mmol, 1.0 equiv.), photocatalyst (5 mol%, 0.01 mmol), MeCN (2 mL) at room temperature under visible light irradiation (blue LED, 460–465 nm, 15 W) under N<sub>2</sub> for 5 h.

<sup>b</sup> Determined by <sup>1</sup>H NMR. <sup>c</sup> Ir[dF(CF<sub>3</sub>)ppy]<sub>2</sub>(bpy)PF<sub>6</sub> (2 mol%, 0.004 mmol).

**Table S2.** Screening of solvents.<sup>a</sup>

| <b>1a</b> | <b>2a</b>                   | <b>3a</b>              |                         |
|-----------|-----------------------------|------------------------|-------------------------|
| Entry     | Solvent                     | Yield of <b>3a</b> (%) | <i>Z:E</i> <sup>b</sup> |
| 1         | DMSO                        | < 5                    | -                       |
| 2         | NMP                         | < 5                    | -                       |
| 3         | DMF                         | < 5                    | -                       |
| 4         | DCM                         | 22                     | 1:1.6                   |
| 5         | THF                         | 75                     | 1:1.4                   |
| <b>6</b>  | <b>MeCN</b>                 | <b>85</b>              | <b>1:2</b>              |
| 7         | Hexane                      | 17                     | 1:0.9                   |
| 8         | EtOH                        | 70                     | 1:1.2                   |
| 9         | Acetone                     | 78                     | 1:1.8                   |
| 10        | Toluene                     | 45                     | 1:1.2                   |
| 11        | 1,4-Dioxane                 | 73                     | 1:1.5                   |
| 12        | H <sub>2</sub> O            | < 5                    | 1:1                     |
| 13        | MeCN/H <sub>2</sub> O (1:1) | 85                     | 1:2                     |
| 14        | DCE/H <sub>2</sub> O (1:1)  | < 5                    | 1:1                     |

<sup>a</sup> Reaction conditions: **1a** (0.2 mmol, 1.0 equiv.), **2a** (0.2 mmol, 1.0 equiv.), 4CzIPN (5 mol%, 0.01 mmol), solvent (2 mL) at room temperature under visible light irradiation (blue LED, 460-465 nm, 15 W) under N<sub>2</sub> for 5 h. <sup>b</sup> Determined by <sup>1</sup>H NMR.

**Table S3.** Screening of catalyst loading.<sup>a</sup>

| <b>1a</b> | <b>2a</b>  | <b>3a</b>              |                         |
|-----------|------------|------------------------|-------------------------|
| Entry     | x mol%     | Yield of <b>3a</b> (%) | <i>Z:E</i> <sup>b</sup> |
| 1         | 5          | 85                     | 1:2                     |
| <b>2</b>  | <b>2.5</b> | <b>85</b>              | <b>1:2</b>              |
| 3         | 1          | 70                     | 1:2                     |

<sup>a</sup> Reaction conditions: **1a** (0.2 mmol, 1.0 equiv.), **2a** (0.2 mmol, 1.0 equiv.), 4CzIPN (x mol%), MeCN (2 mL) at room temperature under visible light irradiation (blue LED, 460-465 nm, 15 W) under N<sub>2</sub> for 12 h. <sup>b</sup> Determined by <sup>1</sup>H NMR.

**Table S4.** Screening of conditions for isomerization of **3a**.

**3a** **Z-3a**

| Entry    | conditions                                                    | Time (h) | Yield of <b>3a</b> (%) | <b>Z:E</b> <sup>b</sup> |
|----------|---------------------------------------------------------------|----------|------------------------|-------------------------|
| 1        | UV irradiation (365 nm)                                       | 12       | 100                    | 1:1.4                   |
| 2        | Ph <sub>2</sub> S <sub>2</sub> (100 mol%) (blue LED, 15 W)    | 1        | 88                     | >20:1                   |
| <b>3</b> | <b>Ph<sub>2</sub>S<sub>2</sub> (20 mol%) (blue LED, 15 W)</b> | <b>1</b> | <b>90</b>              | <b>&gt;20:1</b>         |
| 4        | Ph <sub>2</sub> S <sub>2</sub> (5 mol%) (blue LED, 15 W)      | 1        | 90                     | 15:1                    |

<sup>a</sup> Reaction conditions: **3a** (0.2 mmol, 1.0 equiv.), MeCN (2 mL) at room temperature under N<sub>2</sub>. <sup>b</sup> Determined by <sup>1</sup>H NMR.

**Table S5.** Screening of reaction conditions for the synthesis of **5a**.

**2c** + **4a** **5a**

| Entry                 | Base                            | Solvent          | Yield of <b>5a</b> (%) |
|-----------------------|---------------------------------|------------------|------------------------|
| 1                     | Et <sub>3</sub> N               | MeCN             | trace                  |
| 2                     | Et <sub>3</sub> N               | THF              | trace                  |
| 3                     | K <sub>2</sub> CO <sub>3</sub>  | THF              | 41                     |
| 4                     | Na <sub>2</sub> CO <sub>3</sub> | THF              | 31                     |
| 5                     | NaHCO <sub>3</sub>              | THF              | 62                     |
| 6                     | NaOAc                           | THF              | 88                     |
| 7                     | K <sub>2</sub> HPO <sub>4</sub> | THF              | 54                     |
| 8                     | Imidazole                       | THF              | 85                     |
| 9                     | Pyridine                        | THF              | 85                     |
| 10                    | Imidazole                       | EA               | 88                     |
| 11                    | Imidazole                       | EtOH             | 77                     |
| 12                    | Imidazole                       | 1,4-dioxane      | 90                     |
| 13                    | Imidazole                       | DMF              | 64                     |
| 14                    | Imidazole                       | DCM              | N.D.                   |
| 15                    | Imidazole                       | DME              | 92                     |
| 16                    | -                               | DME              | 13                     |
| 17                    | Imidazole                       | H <sub>2</sub> O | N.D.                   |
| 18 <sup>b</sup>       | Imidazole                       | DME              | 49                     |
| <b>19<sup>c</sup></b> | <b>Imidazole</b>                | <b>DME</b>       | <b>92</b>              |

<sup>a</sup> Reaction conditions: **2c** (0.2 mmol, 1.0 equiv.), **4a** (0.4 mmol, 2.0 equiv.), 4CzIPN (5 mol%, 0.01 mmol), base (1.0 equiv.), solvent (2 mL) at room temperature under visible light irradiation (blue LED, 460-465 nm, 15 W) under N<sub>2</sub> for 1 h. <sup>b</sup> 4CzIPN (2.5 mol%). <sup>c</sup> **4a** (0.24 mmol, 1.2 equiv.)

## Mechanistic Studies

### Radical trapping experiments

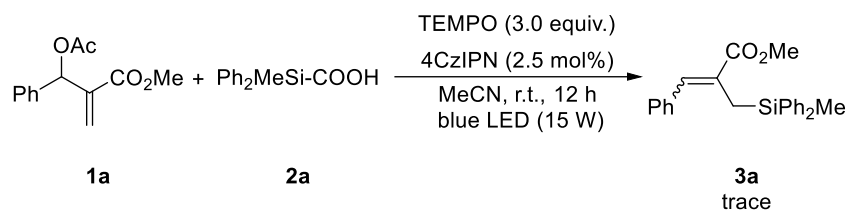

Under nitrogen atmosphere, a 10 mL tube equipped with a magnetic stirrer bar was charged sequentially with allyl acetate **1a** (46.9 mg, 0.2 mmol, 1.0 equiv.), Ph<sub>2</sub>MeSiCOOH **2a** (48.5 mg, 0.2 mmol, 1.0 equiv.), TEMPO (93.8 mg, 3.0 equiv.) and 4CzIPN (4.0 mg, 0.005 mmol, 2.5 mol%). Then MeCN (0.1 M, 2 mL) was injected into the reaction tube. The solution was stirred under irradiation with 15 W blue LED at room temperature for 12 h. The reaction mixture was diluted with DCM and detected by GC-MS. The product **3a** was observed in trace amount, indicating the reaction was suppressed by the radical scavenger.

### Light/dark experiment

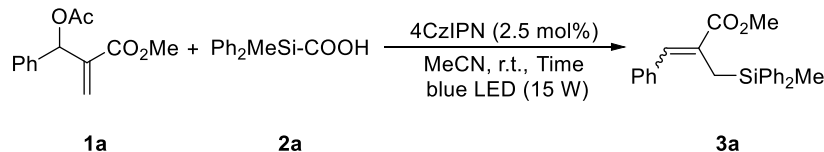

Under nitrogen atmosphere, five 10 mL tubes (No. 1-5) equipped with magnetic stirrer bars were charged sequentially with allyl acetate **1a** (46.9 mg, 0.2 mmol, 1.0 equiv.), Ph<sub>2</sub>MeSiCOOH **2a** (48.5 mg, 0.2 mmol, 1.0 equiv.), and 4CzIPN (4.0 mg, 0.005 mmol, 2.5 mol%). Then MeCN (0.1 M, 2 mL) was injected into the reaction tube and the reaction mixtures were stirred under irradiation. After 10 min, the Blue LED was turned off, and No.1 vial was removed from the irradiation setup for analysis. The remaining four vials were stirred in the absence of light for an additional 10 min. Then, No.2 vial was removed for analysis, and the Blue LED was turned back on to irradiate the remaining three reaction mixtures. After an additional 10 min of irradiation, the Blue LED was turned off, and No. 3 vial was removed for analysis. The remaining two vials were stirred in the absence of light for an additional 10 min. Then, No. 4 vial was removed for analysis, and the Blue LED was turned back on to irradiate the remaining last reaction mixture for 10 min, and then it was analyzed. Yields were determined by analysis of the crude <sup>1</sup>H NMR spectra using 1,3,5-trimethoxybenzene as an internal standard.

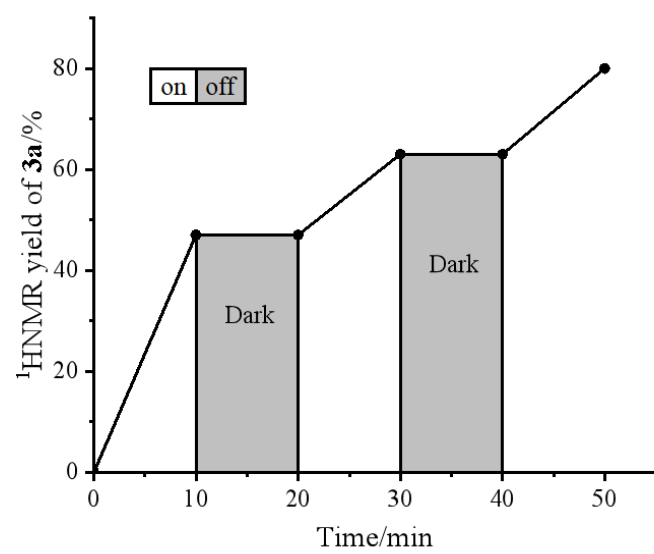

### Synthesis of allylsilanes 3

#### Typical procedure for the synthesis of 3a

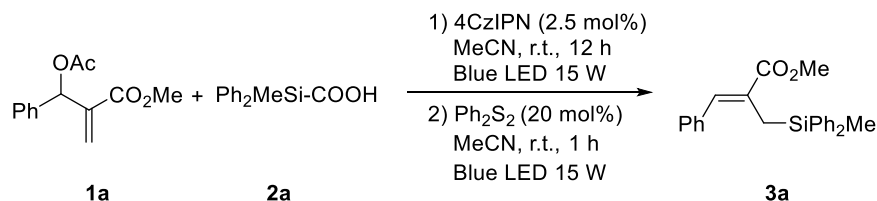

Under nitrogen atmosphere, a 10 mL tube equipped with a magnetic stirrer bar was charged sequentially with allyl acetate **1a** (46.9 mg, 0.2 mmol, 1.0 equiv.), Ph<sub>2</sub>MeSiCOOH **2a** (48.5 mg, 0.2 mmol, 1.0 equiv.), and 4CzIPN (4.0 mg, 0.005 mmol, 2.5 mol%). Then MeCN (0.1 M, 2 mL) was injected into the reaction tube. The solution was stirred under irradiation with 15 W blue LED at room temperature for 12 h. Upon completion, solvent was removed under vacuum and the residue was purified by a short flash column chromatography to afford the crude product. A solution of the crude product and Ph<sub>2</sub>S<sub>2</sub> (8.7 mg, 0.04 mmol, 20 mol%) in MeCN (0.1 M, 2 mL) was stirred under irradiation with 15 W blue LED at room temperature for 1 h. Upon completion, solvent was removed under vacuum and the residue was purified by SiO<sub>2</sub> column chromatography to afford the desired product **3a**.

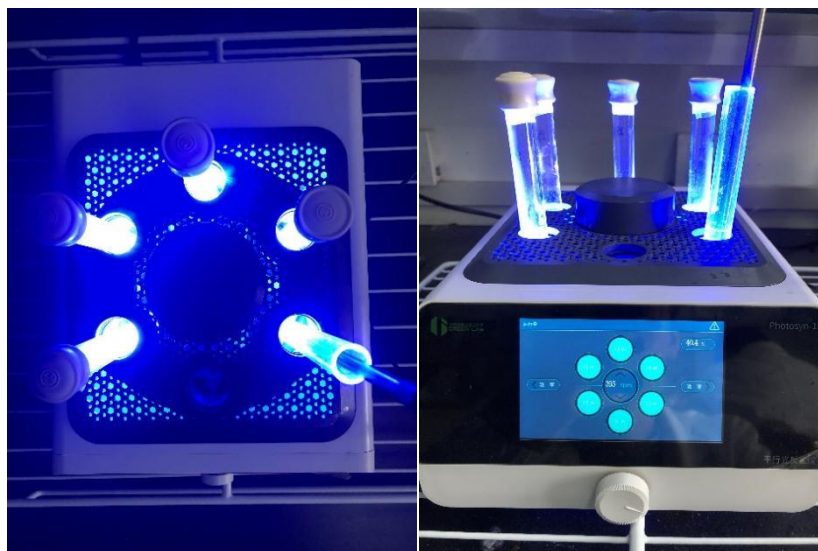

**Figure S1.** Experimental setup

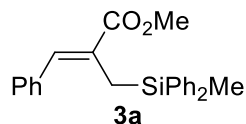

**methyl (Z)-2-((methyldiphenylsilyl)methyl)-3-phenylacrylate**

The crude product was purified by column chromatography (SiO<sub>2</sub>, PE:EA 20:1). Colorless oil. 65.4 mg, 75% yield.

<sup>1</sup>H NMR (400 MHz, CDCl<sub>3</sub>): δ 7.58 (s, 1H), 7.51-7.47 (m, 4H), 7.39-7.31 (m, 6H), 7.26-7.18 (m, 5H), 3.55 (s, 3H), 2.72 (d, *J* = 0.9 Hz, 1H), 0.52 (s, 3H).

<sup>13</sup>C NMR (100 MHz, CDCl<sub>3</sub>): δ 169.2, 136.5, 136.4, 136.2, 134.7, 130.6, 129.4, 129.1, 128.4, 127.91, 127.88, 51.9, 16.2, -3.8.

HRMS (ESI-TOF) *m/z*: [M + Na]<sup>+</sup> calculated for C<sub>24</sub>H<sub>24</sub>O<sub>2</sub>NaSi, 395.1438; found 395.1444.

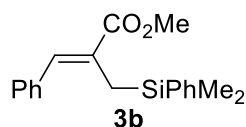

**methyl (Z)-2-((dimethyl(phenyl)silyl)methyl)-3-phenylacrylate**

The crude product was purified by column chromatography (SiO<sub>2</sub>, PE:EA 20:1). Colorless oil. 43.5 mg, 70% yield.

<sup>1</sup>H NMR (400 MHz, CDCl<sub>3</sub>) δ 7.56 (s, 1H), 7.48-7.46 (m, 2H), 7.34-7.33 (m, 3H), 7.30-7.26 (m, 4H), 3.70 (s, 3H), 2.41 (s, 2H), 0.27 (s, 6H).

<sup>13</sup>C NMR (100 MHz, CDCl<sub>3</sub>) δ 169.4, 138.7, 136.4, 135.8, 133.7, 131.0, 129.20, 129.15, 128.4, 127.9, 127.8, 52.0, 17.6, -2.4.

HRMS (ESI-TOF) *m/z*: [M + Na]<sup>+</sup> calculated for C<sub>19</sub>H<sub>22</sub>O<sub>2</sub>NaSi, 333.1281; found 333.1280.

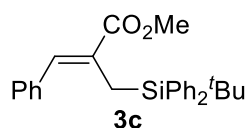

**methyl (Z)-2-((tert-butyldiphenylsilyl)methyl)-3-phenylacrylate**

The crude product was purified by column chromatography (SiO<sub>2</sub>, PE:EA 20:1). Colorless oil. 70.5 mg, 85% yield.

<sup>1</sup>H NMR (400 MHz, CDCl<sub>3</sub>) δ 7.39-7.35 (m, 4H), 7.32 (s, 1H), 7.28-7.23 (m, 2H), 7.19-7.15 (m, 7H), 7.12-7.09 (m, 2H), 3.20 (s, 3H), 2.63 (d, *J* = 1.1 Hz, 2H), 0.94 (s, 9H).

<sup>13</sup>C NMR (100 MHz, CDCl<sub>3</sub>) δ 168.9, 136.54, 136.49, 136.2, 134.1, 131.7, 129.07, 129.03, 128.4, 127.7, 127.3, 51.5, 27.6, 18.7, 11.7.

HRMS (ESI-TOF)  $m/z$ :  $[M + Na]^+$  calculated for  $C_{27}H_{30}O_2NaSi$ , 437.1907; found 437.1909.

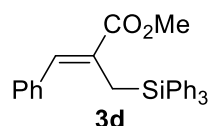

**methyl (*Z*)-3-phenyl-2-((triphenylsilyl)methyl)acrylate**

The crude product was purified by column chromatography ( $SiO_2$ , PE:EA 20:1). Colorless oil. 86.4 mg, 99% yield.

$^1H$  NMR (400 MHz,  $CDCl_3$ )  $\delta$  7.46 (s, 1H), 7.40-7.38 (m, 6H), 7.32-7.21 (m, 9H), 7.11-7.00 (m, 5H), 3.20 (s, 3H), 2.85 (s, 2H).

$^{13}C$  NMR (100 MHz,  $CDCl_3$ )  $\delta$  168.9, 136.7, 136.1, 134.4, 130.9, 129.6, 129.1, 128.4, 127.9, 51.6, 15.7.

HRMS (ESI-TOF)  $m/z$ :  $[M + Na]^+$  calculated for  $C_{29}H_{26}O_2NaSi$ , 457.1594; found 457.1599.

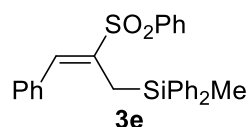

**(*E*)-methylidiphenyl(3-phenyl-2-(phenylsulfonyl)allyl)silane**

The crude product was purified by column chromatography ( $SiO_2$ , PE:EA 20:1). Colorless oil. 72.6 mg, 80% yield.

$^1H$  NMR (400 MHz,  $CDCl_3$ )  $\delta$  7.77 (dd,  $J = 8.3, 1.3$  Hz, 2H), 7.69 (s, 1H), 7.63-7.55 (m, 2H), 7.48-7.46 (m, 5H), 7.42-7.30 (m, 6H), 7.24-7.11 (m, 5H), 2.53 (s, 2H), 0.64 (s, 3H).

$^{13}C$  NMR (100 MHz,  $CDCl_3$ )  $\delta$  140.0, 139.2, 136.6, 135.4, 134.7, 134.07, 133.97, 133.3, 130.0, 129.5, 129.3, 129.2, 129.0, 128.6, 128.4, 128.04, 127.95, 16.1, -3.8.

HRMS (ESI-TOF)  $m/z$ :  $[M + Na]^+$  calculated for  $C_{28}H_{26}O_2NaSSi$ , 477.1315; found 477.1317.

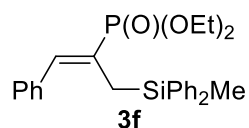

**diethyl (*E*)-3-(methylidiphenylsilyl)-1-phenylprop-1-en-2-ylphosphonate**

The crude product was purified by column chromatography ( $SiO_2$ , PE:EA 5:1 to 2:1). Colorless oil. 49.0 mg, 54% yield.

$^1H$  NMR (400 MHz,  $CDCl_3$ )  $\delta$  7.47-7.45 (m, 4H), 7.41 (s, 1H), 7.37-7.28 (m, 6H), 7.25-7.19 (m, 5H), 3.98-3.94 (m, 4H), 2.67 (dd,  $J = 21.2, 1.1$  Hz, 2H), 1.20 (t,  $J = 7.1$  Hz, 6H), 0.56 (s, 3H).

$^{13}\text{C}$  NMR (100 MHz,  $\text{CDCl}_3$ )  $\delta$  140.2 (d,  $J = 11.9$  Hz), 137.3, 136.1 (d,  $J = 23.9$  Hz), 134.6, 129.5, 129.2, 129.1 (d,  $J = 1.7$  Hz), 128.4, 128.0, 127.8, 61.8 (d,  $J = 6.0$  Hz), 16.32 (d,  $J = 6.3$  Hz), 16.30 (d,  $J = 9.5$  Hz), -3.8.

$^{31}\text{P}$  NMR (162 MHz,  $\text{CDCl}_3$ )  $\delta$  22.06.

HRMS (ESI-TOF)  $m/z$ :  $[\text{M} + \text{Na}]^+$  calculated for  $\text{C}_{26}\text{H}_{31}\text{O}_3\text{NaPSi}$ , 473.1672; found 473.1674.

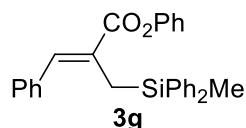

**phenyl (Z)-2-((methyldiphenylsilyl)methyl)-3-phenylacrylate**

The crude product was purified by column chromatography ( $\text{SiO}_2$ , PE:EA 20:1). Colorless oil. 79.4 mg, 91% yield.

$^1\text{H}$  NMR (400 MHz,  $\text{CDCl}_3$ )  $\delta$  7.70 (s, 1H), 7.42 (dd,  $J = 7.9, 1.6$  Hz, 4H), 7.32-7.22 (m, 9H), 7.15-7.12 (m, 5H), 6.76 (d,  $J = 7.6$  Hz, 2H), 2.74 (s, 2H), 0.49 (s, 3H).

$^{13}\text{C}$  NMR (100 MHz,  $\text{CDCl}_3$ )  $\delta$  167.4, 151.1, 137.9, 136.4, 136.0, 134.9, 130.4, 129.5, 129.4, 129.3, 128.5, 128.3, 128.0, 125.8, 121.8, 16.3, -3.3.

HRMS (ESI-TOF)  $m/z$ :  $[\text{M} + \text{H}]^+$  calculated for  $\text{C}_{29}\text{H}_{27}\text{O}_2\text{Si}$ , 457.1594; found 457.1594.

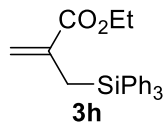

**ethyl 2-((triphenylsilyl)methyl)acrylate**

The crude product was purified by column chromatography ( $\text{SiO}_2$ , PE:EA 20:1). Colorless oil. 53.6 mg, 72% yield.

$^1\text{H}$  NMR (400 MHz,  $\text{CDCl}_3$ )  $\delta$  7.56-7.54 (m, 6H), 7.44-7.35 (m, 9H), 6.01 (s, 1H), 5.30 (s, 1H), 3.72 (q,  $J = 7.0$  Hz, 2H), 2.74 (s, 2H), 1.06 (t,  $J = 7.1$  Hz, 3H).

$^{13}\text{C}$  NMR (100 MHz,  $\text{CDCl}_3$ ) 167.4, 137.3, 136.0, 134.2, 129.7, 127.9, 123.8, 60.7, 18.4, 14.0.

HRMS (ESI-TOF)  $m/z$ :  $[\text{M} + \text{Na}]^+$  calculated for  $\text{C}_{24}\text{H}_{24}\text{O}_2\text{NaSi}$ , 395.1438; found 395.1441.

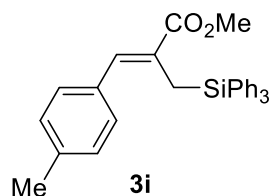

**methyl (Z)-3-(p-tolyl)-2-((triphenylsilyl)methyl)acrylate**

The crude product was purified by column chromatography ( $\text{SiO}_2$ , PE:EA 20:1). Colorless oil. 79.9

mg, 89% yield.

$^1\text{H}$  NMR (400 MHz,  $\text{CDCl}_3$ )  $\delta$  7.54-7.49 (m, 7H), 7.41-7.39 (m, 3H), 7.36-7.32 (m, 6H), 7.04 (d,  $J$  = 7.8 Hz, 2H), 6.97 (d,  $J$  = 7.8 Hz, 2H), 3.31 (s, 3H), 2.95 (s, 2H), 2.33 (s, 3H).

$^{13}\text{C}$  NMR (100 MHz,  $\text{CDCl}_3$ )  $\delta$  169.1, 138.0, 136.8, 136.1, 134.5, 133.2, 130.0, 129.6, 129.2, 129.1, 127.9, 51.6, 21.4, 15.7.

HRMS (ESI-TOF)  $m/z$ :  $[\text{M} + \text{K}]^+$  calculated for  $\text{C}_{30}\text{H}_{28}\text{O}_2\text{KSi}$ , 487.1490; found 487.1487.

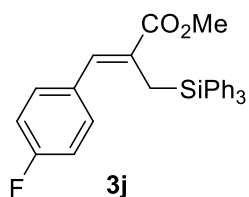

**methyl (*Z*)-3-(4-fluorophenyl)-2-((triphenylsilyl)methyl)acrylate**

The crude product was purified by column chromatography ( $\text{SiO}_2$ , PE:EA 20:1). Colorless oil. 68.9 mg, 76% yield.

$^1\text{H}$  NMR (400 MHz,  $\text{CDCl}_3$ )  $\delta$  7.50-7.49 (m, 7H), 7.44-7.40 (m, 3H), 7.37-7.33 (m, 6H), 7.07 (dd,  $J$  = 8.4, 5.5 Hz, 2H), 6.83 (dd,  $J_1 = J_2$  = 8.5 Hz, 2H), 3.31 (s, 3H), 2.91 (s, 2H).

$^{13}\text{C}$  NMR (100 MHz,  $\text{CDCl}_3$ )  $\delta$  168.8, 163.3 (d,  $J$  = 247.8 Hz), 136.1, 135.5, 134.2, 132.1 (d,  $J$  = 3.2 Hz), 130.9 (d,  $J$  = 8.3 Hz), 130.8, 129.7, 127.9, 115.4 (d,  $J$  = 21.4 Hz), 51.7, 15.8.

$^{19}\text{F}$  NMR (471 MHz,  $\text{CDCl}_3$ )  $\delta$  -113.2.

HRMS (ESI-TOF)  $m/z$ :  $[\text{M} + \text{Na}]^+$  calculated for  $\text{C}_{29}\text{H}_{25}\text{O}_2\text{FNaSi}$ , 475.1500; found 475.1513.

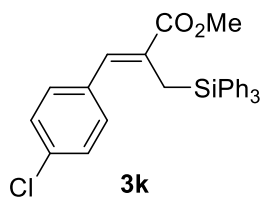

**methyl (*Z*)-3-(4-chlorophenyl)-2-((triphenylsilyl)methyl)acrylate**

The crude product was purified by column chromatography ( $\text{SiO}_2$ , PE:EA 20:1). Colorless oil. 69.0 mg, 74% yield.

$^1\text{H}$  NMR (400 MHz,  $\text{CDCl}_3$ )  $\delta$  7.51-7.49 (m, 7H), 7.44-7.40 (m, 3H), 7.39-7.32 (m, 6H), 7.12 (d,  $J$  = 8.5 Hz, 2H), 7.02 (d,  $J$  = 8.3 Hz, 2H), 3.32 (s, 3H), 2.92 (s, 2H).

$^{13}\text{C}$  NMR (100 MHz,  $\text{CDCl}_3$ )  $\delta$  168.7, 136.0, 135.3, 134.5, 134.1, 133.7, 131.5, 130.4, 129.8, 128.6, 128.0, 51.7, 15.9.

HRMS (ESI-TOF)  $m/z$ :  $[\text{M} + \text{Na}]^+$  calculated for  $\text{C}_{29}\text{H}_{25}\text{ClO}_2\text{NaSi}$ , 491.1205; found 491.1201.

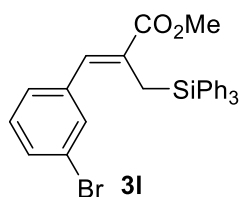

**methyl (Z)-3-(3-bromophenyl)-2-((triphenylsilyl)methyl)acrylate**

The crude product was purified by column chromatography (SiO<sub>2</sub>, PE:EA 20:1). Colorless oil. 60.7 mg, 60% yield.

<sup>1</sup>H NMR (400 MHz, CDCl<sub>3</sub>)  $\delta$  7.48-7.38 (m, 10H), 7.35-7.31 (m, 7H), 7.22 (s, 1H), 7.01-6.99 (m, 2H), 3.31 (s, 3H), 2.92 (s, 2H).

<sup>13</sup>C NMR (100 MHz, CDCl<sub>3</sub>)  $\delta$  168.6, 138.3, 136.0, 135.0, 134.0, 132.3, 131.6, 130.8, 129.9, 129.7, 128.0, 127.5, 122.6, 51.8, 15.8.

HRMS (ESI-TOF) m/z: [M + Na]<sup>+</sup> calculated for C<sub>29</sub>H<sub>25</sub>BrO<sub>2</sub>NaSi, 535.0699; found 535.0701.

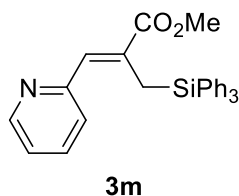

**methyl (Z)-2-((dimethyl(phenyl)silyl)methyl)-3-(pyridin-2-yl)acrylate**

The crude product was purified by column chromatography (SiO<sub>2</sub>, PE:EA 40:1 to 20:1). White solid, mp 96-98 °C (PE:EA). 77.5 mg, 89% yield.

<sup>1</sup>H NMR (400 MHz, CDCl<sub>3</sub>)  $\delta$  8.27 (dd, *J* = 5.4, 2.0 Hz, 1H), 7.47-7.36 (m, 7H), 7.29-7.22 (m, 4H), 7.22-7.16 (m, 6H), 6.94-6.92 (m, 2H), 3.59 (s, 3H), 3.32 (s, 2H).

<sup>13</sup>C NMR (100 MHz, CDCl<sub>3</sub>)  $\delta$  169.1, 155.4, 148.9, 136.1, 136.0, 134.9, 134.6, 133.4, 129.3, 127.5, 126.1, 122.1, 51.8, 16.0.

HRMS (ESI-TOF) m/z: [M + H]<sup>+</sup> calculated for C<sub>28</sub>H<sub>25</sub>NO<sub>2</sub>Si, 436.1727; found 436.1725.

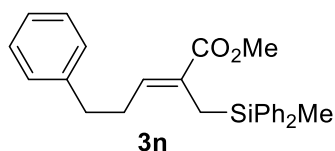

**methyl (Z)-2-((methyldiphenylsilyl)methyl)-5-phenylpent-2-enoate**

The crude product was purified by column chromatography (SiO<sub>2</sub>, PE:EA 20:1). Colorless oil. 51.0 mg, 64% yield.

<sup>1</sup>H NMR (400 MHz, CDCl<sub>3</sub>)  $\delta$  7.65-7.63 (m, 4H), 7.48-7.42 (m, 7H), 7.37-7.33 (m, 2H), 7.19-7.16 (m, 1H), 7.12 (d, *J* = 7.6 Hz, 2H), 6.77 (t, *J* = 7.2 Hz, 1H), 3.61 (s, 3H), 2.62 (t, *J* = 7.8 Hz, 2H),

2.45 (s, 2H), 2.23 (td,  $J = 7.8, 7.7$  Hz, 2H), 0.63 (s, 3H).

$^{13}\text{C}$  NMR (100 MHz,  $\text{CDCl}_3$ )  $\delta$  168.6, 141.4, 139.1, 136.6, 134.8, 129.5, 129.4, 128.5, 128.4, 127.9, 126.1, 51.6, 34.8, 30.8, 15.8, -4.0.

HRMS (ESI-TOF)  $m/z$ :  $[\text{M} + \text{Na}]^+$  calculated for  $\text{C}_{26}\text{H}_{28}\text{O}_2\text{NaSi}$ , 423.1751; found 423.1751.

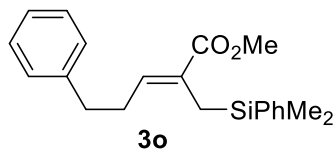

**methyl (Z)-2-((dimethyl(phenyl)silyl)methyl)-5-phenylpent-2-enoate**

The crude product was purified by column chromatography ( $\text{SiO}_2$ , PE:EA 20:1). Colorless oil. 44.0 mg, 65% yield.

$^1\text{H}$  NMR (400 MHz,  $\text{CDCl}_3$ )  $\delta$  7.52-7.49 (m, 2H), 7.36-7.34 (m, 3H), 7.30-7.28 (m, 2H), 7.22-7.20 (m, 1H), 7.11-7.09 (m, 2H), 6.65 (t,  $J = 7.2$  Hz, 1H), 3.62 (s, 3H), 2.61 (t,  $J = 7.9$  Hz, 2H), 2.23 (td,  $J = 7.9, 7.2$  Hz, 2H), 2.01 (s, 2H), 0.28 (s, 6H).

$^{13}\text{C}$  NMR (100 MHz,  $\text{CDCl}_3$ )  $\delta$  168.7, 141.5, 138.8, 138.4, 133.7, 129.9, 129.2, 128.5, 128.4, 127.9, 126.1, 51.7, 34.9, 30.9, 17.3, -2.7.

HRMS (ESI-TOF)  $m/z$ :  $[\text{M} + \text{Na}]^+$  calculated for  $\text{C}_{21}\text{H}_{26}\text{O}_2\text{NaSi}$ , 361.1594; found 361.1591.

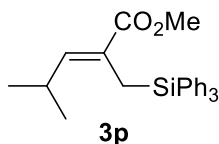

**methyl (Z)-4-methyl-2-((triphenylsilyl)methyl)pent-2-enoate**

The crude product was purified by column chromatography ( $\text{SiO}_2$ , PE:EA 20:1). Colorless oil. 54.0 mg, 67% yield.

$^1\text{H}$  NMR (400 MHz,  $\text{CDCl}_3$ )  $\delta$  7.45-7.43 (m, 6H), 7.25-7.34 (m, 9H), 6.31 (d,  $J = 10.2$  Hz, 1H), 3.16 (s, 3H), 2.57 (s, 2H), 2.29-2.22 (m, 1H), 0.62 (d,  $J = 6.6$  Hz, 6H).

$^{13}\text{C}$  NMR (100 MHz,  $\text{CDCl}_3$ )  $\delta$  168.8, 147.0, 136.1, 134.4, 129.6, 127.8, 126.5, 51.3, 28.5, 21.8, 14.8.

HRMS (ESI-TOF)  $m/z$ :  $[\text{M} + \text{Na}]^+$  calculated for  $\text{C}_{26}\text{H}_{28}\text{O}_2\text{NaSi}$ , 423.1751; found 423.1755.

## Synthesis of allylsilanes 5

### Typical procedure for the synthesis of 5a

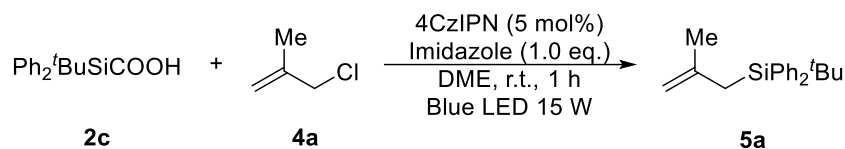

A 10 mL tube equipped with a magnetic stirrer bar was charged sequentially with  $\text{Ph}_2^t\text{BuSiCOOH}$  (0.2 mmol, 1.0 equiv.), imidazole (0.2 mmol, 1.0 equiv.) and 4CzIPN (7.9 mg, 5 mol%), evacuated and refilled with  $\text{N}_2$ . DME (2 mL) and allyl chloride (0.24 mmol, 1.2 equiv.) were sequentially added and the solution was stirred under irradiation with 15 W blue LED at room temperature for 1 h. Upon completion, solvent was removed under vacuum and the residue was purified by  $\text{SiO}_2$  column chromatography to afford the desired product **5a**.

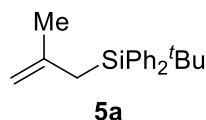

#### *tert*-butyl(2-methylallyl)diphenylsilane

The crude product was purified by column chromatography ( $\text{SiO}_2$ , PE). Colorless oil. 54.2 mg, 92% yield.

$^1\text{H}$  NMR (400 MHz,  $\text{CDCl}_3$ )  $\delta$  7.70-7.67 (m, 4H), 7.44-7.35 (m, 6H), 4.61 (s, 1H), 4.59 (s, 1H), 2.25 (s, 2H), 1.42 (s, 3H), 1.11 (s, 9H).

$^{13}\text{C}$  NMR (100 MHz,  $\text{CDCl}_3$ )  $\delta$  143.4, 136.3, 135.0, 129.2, 127.5, 110.9, 27.9, 25.6, 22.3, 18.7.

HRMS (ESI-TOF)  $m/z$ :  $[\text{M} + \text{Na}]^+$  calculated for  $\text{C}_{20}\text{H}_{26}\text{NaSi}$ , 317.1696; found 317.1696.

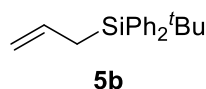

#### allyl(*tert*-butyl)diphenylsilane

The crude product was purified by column chromatography ( $\text{SiO}_2$ , PE). Colorless oil. 44.8 mg, 80% yield. The spectra were in accordance with the reported literature.<sup>4</sup>

$^1\text{H}$  NMR (400 MHz,  $\text{CDCl}_3$ )  $\delta$  7.64-7.61 (m, 4H), 7.43-7.34 (m, 6H), 5.82-5.75 (m, 1H), 4.92 (ddt,  $J$  = 16.6, 3.5, 1.7 Hz, 1H), 4.82 (ddt,  $J$  = 10.0 Hz, 3.3, 1.1 Hz, 1H), 2.21 (dt,  $J$  = 7.9, 1.4 Hz, 2H), 1.08 (s, 9H).

$^{13}\text{C}$  NMR (100 MHz,  $\text{CDCl}_3$ )  $\delta$  136.1, 134.8, 134.5, 129.2, 127.7, 114.6, 28.0, 18.9, 18.6.

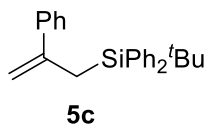

***tert*-butyldiphenyl(2-phenylallyl)silane**

The crude product was purified by column chromatography (SiO<sub>2</sub>, PE). Colorless oil. 53.4 mg, 75% yield.

<sup>1</sup>H NMR (400 MHz, CDCl<sub>3</sub>)  $\delta$  7.59-7.57 (m, 4H), 7.39-7.35 (m, 2H), 7.31-7.29 (m, 4H), 7.22-7.15 (m, 5H), 5.04 (d,  $J$  = 1.4 Hz, 1H), 4.83 (td,  $J_1 = J_2$  = 1.4 Hz, 1H), 2.67 (d,  $J$  = 1.4 Hz, 2H), 1.08 (s, 9H).

<sup>13</sup>C NMR (100 MHz, CDCl<sub>3</sub>)  $\delta$  145.6, 143.5, 136.4, 134.4, 129.0, 128.0, 127.4, 127.0, 126.5, 113.5, 28.0, 19.1, 18.7.

HRMS (ESI-TOF)  $m/z$ : [M + H]<sup>+</sup> calculated for C<sub>25</sub>H<sub>29</sub>Si, 357.2033; found 357.2027.

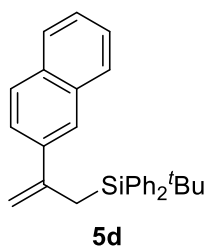

***tert*-butyl(2-(naphthalen-2-yl)allyl)diphenylsilane**

The crude product was purified by column chromatography (SiO<sub>2</sub>, PE to PE:EA = 100:1). Colorless oil. 49.8 mg, 61% yield.

<sup>1</sup>H NMR (400 MHz, CDCl<sub>3</sub>)  $\delta$  7.78-7.75 (m, 1H), 7.68-7.54 (m, 7H), 7.45-7.22 (m, 9H), 5.20 (s, 1H), 4.97 (s, 1H), 2.79 (s, 2H), 1.09 (s, 9H).

<sup>13</sup>C NMR (100 MHz, CDCl<sub>3</sub>)  $\delta$  145.5, 140.5, 136.4, 134.4, 133.2, 132.6, 129.0, 128.3, 127.42, 127.35, 125.8, 125.6, 125.3, 125.1, 113.9, 28.0, 19.3, 18.8.

HRMS (ESI-TOF)  $m/z$ : [M + H]<sup>+</sup> calculated for C<sub>29</sub>H<sub>31</sub>Si, 407.2190; found 407.2175.

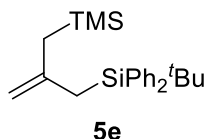

***tert*-butyldiphenyl(2-((trimethylsilyl)methyl)allyl)silane**

The crude product was purified by column chromatography (SiO<sub>2</sub>, PE). Colorless oil. 70.5 mg, 96% yield.

<sup>1</sup>H NMR (400 MHz, CDCl<sub>3</sub>)  $\delta$  7.65-7.63 (m, 4H), 7.39-7.32 (m, 6H), 4.47 (s, 1H), 4.34 (s, 1H), 2.14

(s, 2H), 1.16 (s 2H), 1.08 (s, 9H), 0.08 (s, 9H).

$^{13}\text{C}$  NMR (100 MHz,  $\text{CDCl}_3$ )  $\delta$  136.4, 135.2, 129.1, 127.5, 114.0, 108.1, 29.2, 27.9, 23.0, 18.7, -1.2.

HRMS (ESI-TOF)  $m/z$ :  $[\text{M} + \text{Na}]^+$  calculated for  $\text{C}_{23}\text{H}_{34}\text{NaSi}_2$ , 389.2091; found 389.2092.

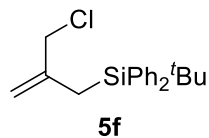

***tert*-butyl(2-(chloromethyl)allyl)diphenylsilane**

The crude product was purified by column chromatography ( $\text{SiO}_2$ , PE). Colorless oil. 43.6 mg, 66% yield.

$^1\text{H}$  NMR (400 MHz,  $\text{CDCl}_3$ )  $\delta$  7.67-7.64 (m, 4H), 7.42-7.35 (m, 6H), 4.93 (d,  $J = 1.2$  Hz, 1H), 4.77 (d,  $J = 1.2$  Hz, 1H), 3.55 (d,  $J = 0.9$  Hz, 2H), 2.35 (d,  $J = 1.1$  Hz, 2H), 1.09 (s, 9H).

$^{13}\text{C}$  NMR (100 MHz,  $\text{CDCl}_3$ )  $\delta$  142.5, 136.3, 134.0, 129.5, 127.7, 115.4, 50.4, 27.9, 18.6, 16.8.

HRMS (ESI-TOF)  $m/z$ :  $[\text{M} + \text{H}]^+$  calculated for  $\text{C}_{20}\text{H}_{26}\text{ClSi}$ , 330.1565; found 330.1558.

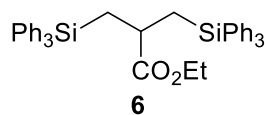

**ethyl 3-bis(trimethylsilyl)propyl-2-oxo-3-oxopropylpropanoate**

Under nitrogen atmosphere, a 10 mL tube equipped with a magnetic stirrer bar was charged sequentially with ethyl 2-(acetoxymethyl)acrylate (31.6 mg, 0.2 mmol, 1.0 equiv.),  $\text{Ph}_3\text{SiCOOH}$  (152.2 mg, 0.5 mmol, 2.5 equiv.), and 4CzIPN (8.0 mg, 0.01 mmol, 5 mol%). Then MeCN (0.1 M, 2 mL) was injected into the reaction tube. The solution was stirred under irradiation with 15 W blue LED at room temperature for 12 h. Upon completion, solvent was removed under vacuum and the residue was purified by column chromatography to afford the desired product **3a** ( $\text{SiO}_2$ , PE:EA 40:1 to 20:1). White solid, (PE:EA) mp 158-160 °C. 66.9 mg, 53% yield.

$^1\text{H}$  NMR (400 MHz,  $\text{CDCl}_3$ )  $\delta$  7.42-7.38 (m, 18H), 7.31-7.28 (m, 12H), 3.16 (q,  $J = 7.2$  Hz, 2H), 3.04-3.00 (m, 1H), 1.85 (dd,  $J = 14.8, 8.8$  Hz, 2H), 1.69 (dd,  $J = 14.8, 5.6$  Hz, 2H), 0.80 (t,  $J = 7.1$  Hz, 3H).

$^{13}\text{C}$  NMR (100 MHz,  $\text{CDCl}_3$ )  $\delta$  176.9, 135.9, 134.5, 129.5, 127.9, 60.1, 36.8, 21.0, 13.6.

HRMS (ESI-TOF)  $m/z$ :  $[\text{M} + \text{Na}]^+$  calculated for  $\text{C}_{42}\text{H}_{40}\text{O}_2\text{NaSi}_2$ , 655.2459; found 655.2454.

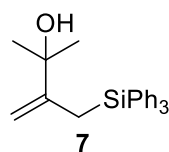

**2-methyl-3-bis(trimethylsilyl)but-3-en-2-ol**

To a solution of **3h** (0.2 mmol, 74.5 mg) in THF (2 mL) was added MeMgBr (2.5 mL, 1.0 M in THF) at 0 °C, and the mixture was stirred at room temperature for 12 h. The reaction was quenched by saturated aqueous  $\text{NH}_4\text{Cl}$  (5 mL) and extracted with EtOAc (5 mL x 2). The combined organic layers were washed with brine, dried ( $\text{MgSO}_4$ ), filtered and evaporated. The crude product was purified by column chromatography ( $\text{SiO}_2$ , PE:EA 40:1 to 20:1). Colorless oil, 65.4 mg, 91% yield.

$^1\text{H}$  NMR (400 MHz,  $\text{CDCl}_3$ )  $\delta$  7.60-7.57 (m, 6H), 7.45-7.31 (m, 9H), 4.91 (s, 1H), 4.70 (s, 1H), 2.51 (s, 2H), 1.20 (s, 6H).

$^{13}\text{C}$  NMR (100 MHz,  $\text{CDCl}_3$ )  $\delta$  151.8, 136.4, 135.1, 129.8, 128.0, 109.3, 73.5, 28.9, 17.0.

HRMS (ESI-TOF)  $m/z$ :  $[\text{M} + \text{Na}]^+$  calculated for  $\text{C}_{24}\text{H}_{26}\text{ONaSi}$ , 381.1645; found 381.1641.

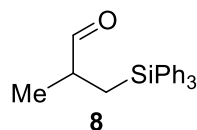

**2-methyl-3-(triphenylsilyl)propanal**

To a solution of LiAlH<sub>4</sub> (0.24 mmol, 7.6 mg) in THF (2 mL) was added **3h** (0.2 mmol, 74.5 mg) at 0 °C, and the mixture was stirred at room temperature for 12 h. H<sub>2</sub>O (5 mL) and EtOAc (5 mL) were added and the organic layer was separated, dried (MgSO<sub>4</sub>), filtered and evaporated. The crude product was purified by column chromatography (SiO<sub>2</sub>, PE:EA 40:1 to 20:1). White solid, mp 55-57 °C (PE:EA). 55.4 mg, 84% yield.

<sup>1</sup>H NMR (400 MHz, CDCl<sub>3</sub>) 9.51 (d, *J* = 1.4 Hz, 1H), 7.77-7.49 (m, 6H), 7.46-7.31 (m, 9H), 2.57-2.52 (m, 1H), 1.95 (dd, *J* = 15.1, 4.9 Hz, 1H), 1.30 (dd, *J* = 15.0, 8.8 Hz, 1H), 1.02 (d, *J* = 7.1 Hz, 3H).

<sup>13</sup>C NMR (100 MHz, CDCl<sub>3</sub>) δ 204.5, 135.8, 134.5, 129.9, 128.2, 42.3, 16.7, 13.9.

HRMS (ESI-TOF) *m/z*: [M + K]<sup>+</sup> calculated for C<sub>22</sub>H<sub>22</sub>OKSi, 369.1072; found 369.1087.

## Reference

- (1) (a) S. D. Friis, R. H. Taaning, A. T. Lindhardt and T. Skrydstrup, Silacarboxylic Acids as Efficient Carbon Monoxide Releasing Molecules: Synthesis and Application in Palladium-Catalyzed Carbonylation Reactions, *J. Am. Chem. Soc.*, 2011, **133**, 18114–18117; (b) N.-X. Xu, B.-X. Li, C. Wang and M. Uchiyama, Sila- and Germacarboxylic Acids: Precursors for the Corresponding Silyl and Germyl Radicals, *Angew. Chem., Int. Ed.*, 2020, **59**, 10639–10644.
- (2) (a) Z. He, B. Wibbeling and A. Studer, Oxidative Heck Coupling of Allylic Amines with 2,2,6,6-Tetramethylpiperidine-N-oxyl (TEMPO) as Oxidant for the Preparation of Tetrasubstituted Alkenes, *Adv. Synth. Catal.*, 2013, **355**, 3639–3647; (b) H. Park, C.-W. Cho and M. J. Krische, Phosphine-Catalyzed Allylic Substitution of Morita–Baylis–Hillman Acetates: Synthesis of N-Protected  $\beta$ -Aminophosphonic Acid Esters, *J. Org. Chem.*, 2006, **71**, 7892–7894; (c) B. Zhu, L. Yan, Y. Pan, R. Lee, H. Liu, Z. Han, K.-W. Huang, C.-H. Tan and Z. Jiang, Lewis Base Catalyzed Enantioselective Allylic Hydroxylation of Morita–Baylis–Hillman Carbonates with Water, *J. Org. Chem.* **2011**, *76*, 6894–6900; (d) V. K. Aggarwal, I. Emme and S. Y. Fulford, Correlation between pKa and Reactivity of Quinuclidine-Based Catalysts in the Baylis–Hillman Reaction: Discovery of Quinuclidine as Optimum Catalyst Leading to Substantial Enhancement of Scope, *J. Org. Chem.*, 2003, **68**, 692–700.
- (3) (a) B. Xu and U. Tambar, Remote Allylation of Unactivated C(sp<sup>3</sup>)–H Bonds Triggered by Photogenerated Amidyl Radicals, *ACS Catal.*, 2019, **9**, 4627–4931; (b) P. Martínez-Balart, B. L. Tóth, Á. Velasco-Rubio and M. Fañanás-Mastral, Direct C–H Allylation of Unactivated Alkanes by Cooperative W/Cu Photocatalysis, *Org. Lett.*, 2022, **24**, 6874–6879.
- (4) (a) G. Zhang, C. Zhang, H. Jiao and F. Chen, Photoredox/nickel cooperatively catalyzed radical allylic silylation of allyl acetates – Scope and mechanism, *J. Catal.*, 2023, **418**, 312–319; (b) S. Ito, A. Hayashi, H. Komai, H. Yamaguchi, Y. Kubota and M. Asami, Mesoporous aluminosilicate-catalyzed allylation of carbonyl compounds and acetals, *Tetrahedron*, 2011, **67**, 2081–2089.

# NMR Spectra of all Compounds

**3a;  $^1\text{H}$  NMR (400 MHz,  $\text{CDCl}_3$ );  $^{13}\text{C}$  NMR (100 MHz,  $\text{CDCl}_3$ )**

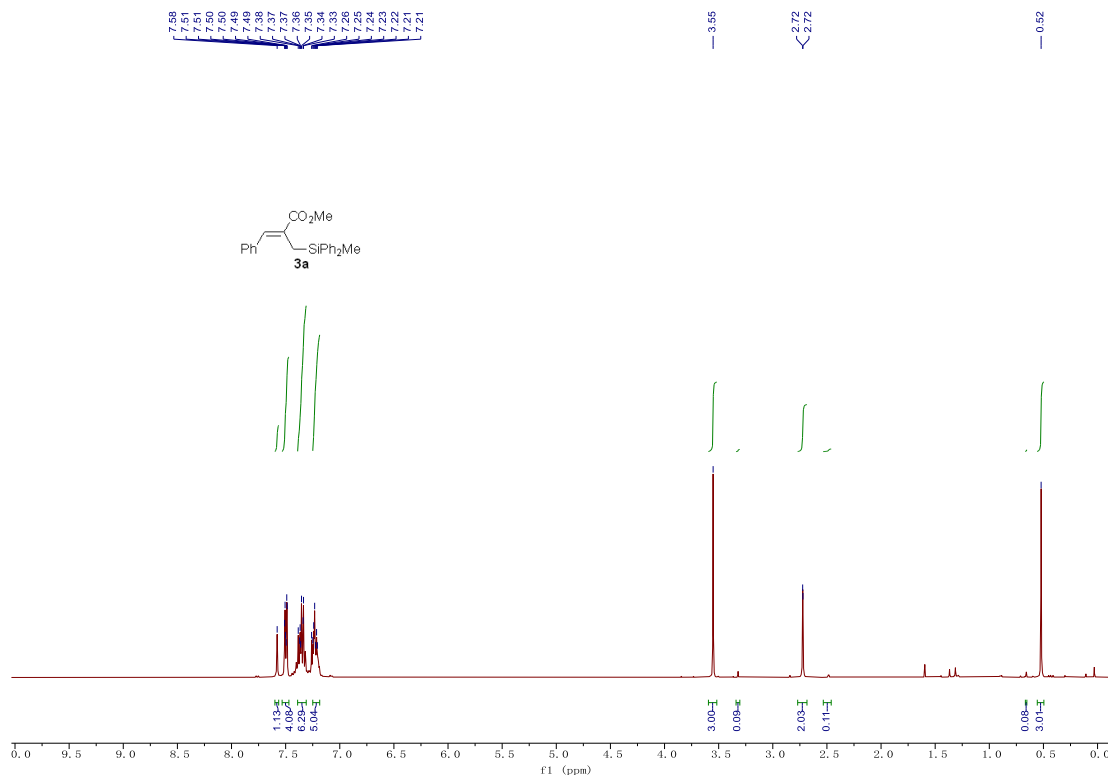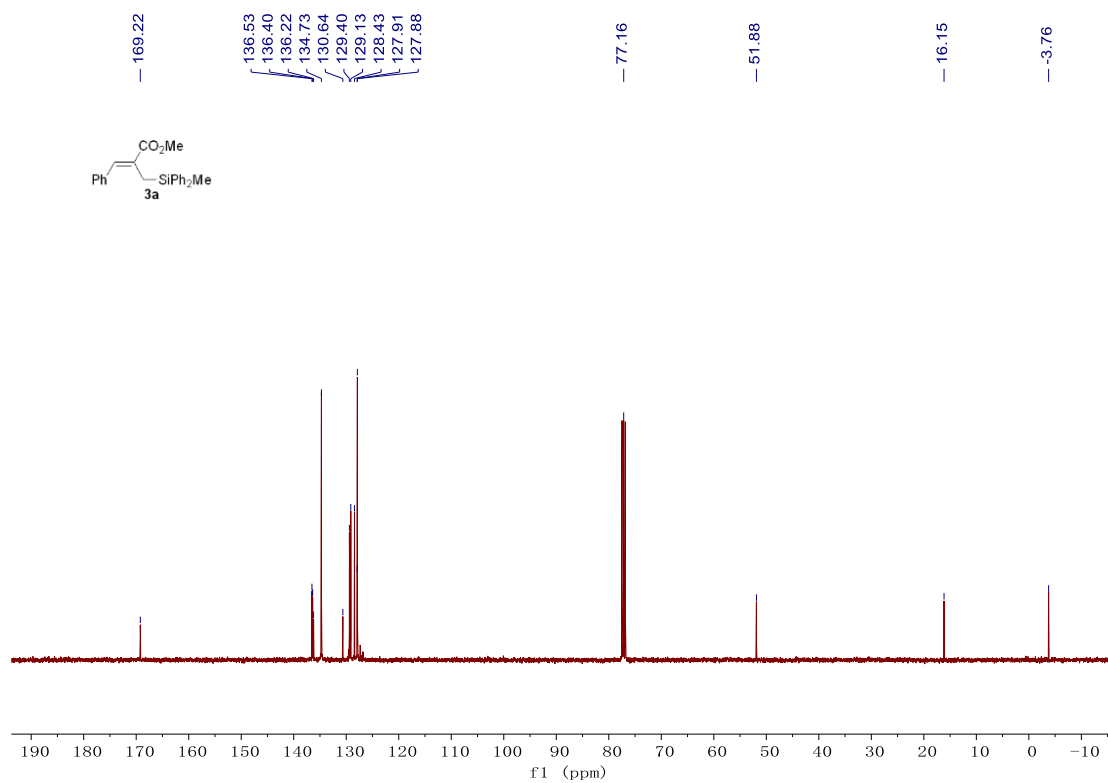

**3b;  $^1\text{H}$  NMR (400 MHz,  $\text{CDCl}_3$ );  $^{13}\text{C}$  NMR (100 MHz,  $\text{CDCl}_3$ )**

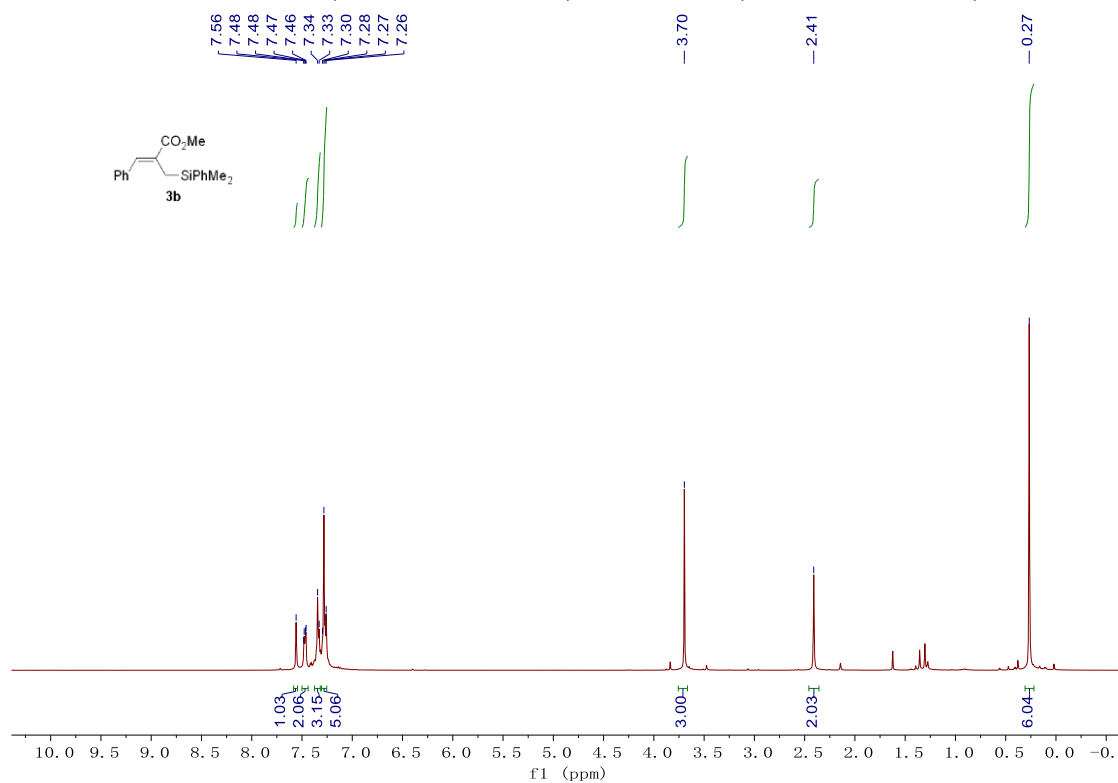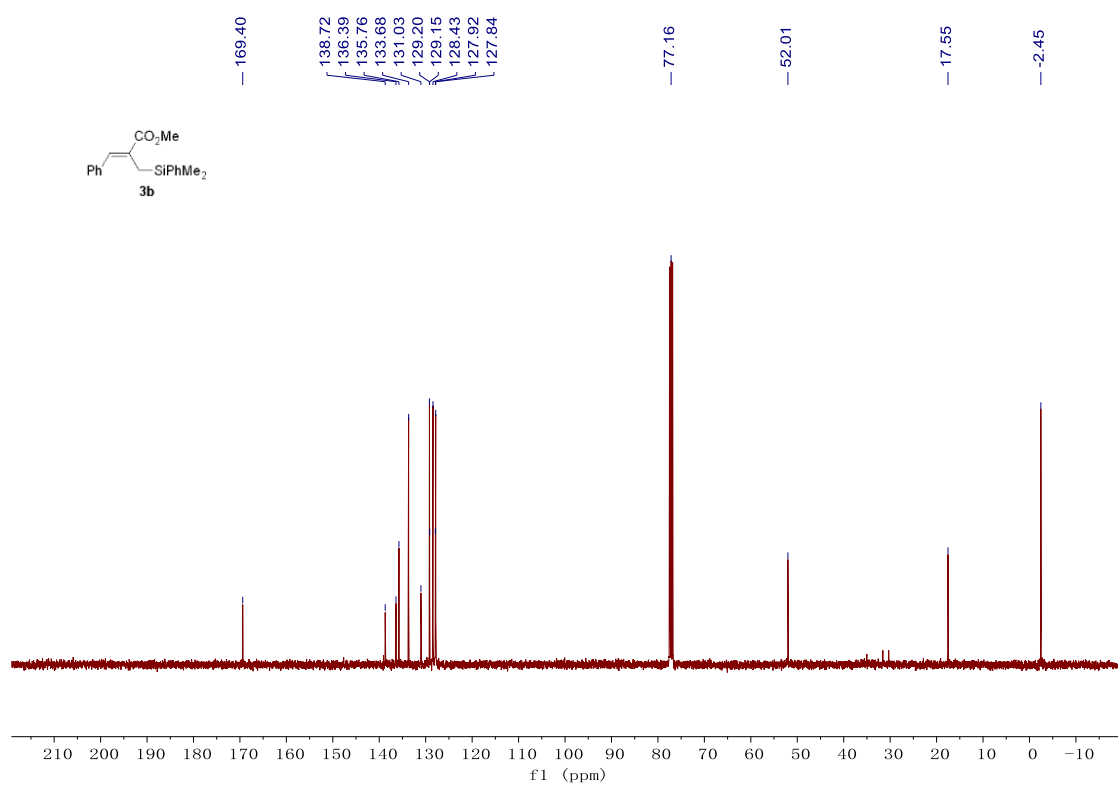

**3c;  $^1\text{H}$  NMR (400 MHz,  $\text{CDCl}_3$ );  $^{13}\text{C}$  NMR (100 MHz,  $\text{CDCl}_3$ )**

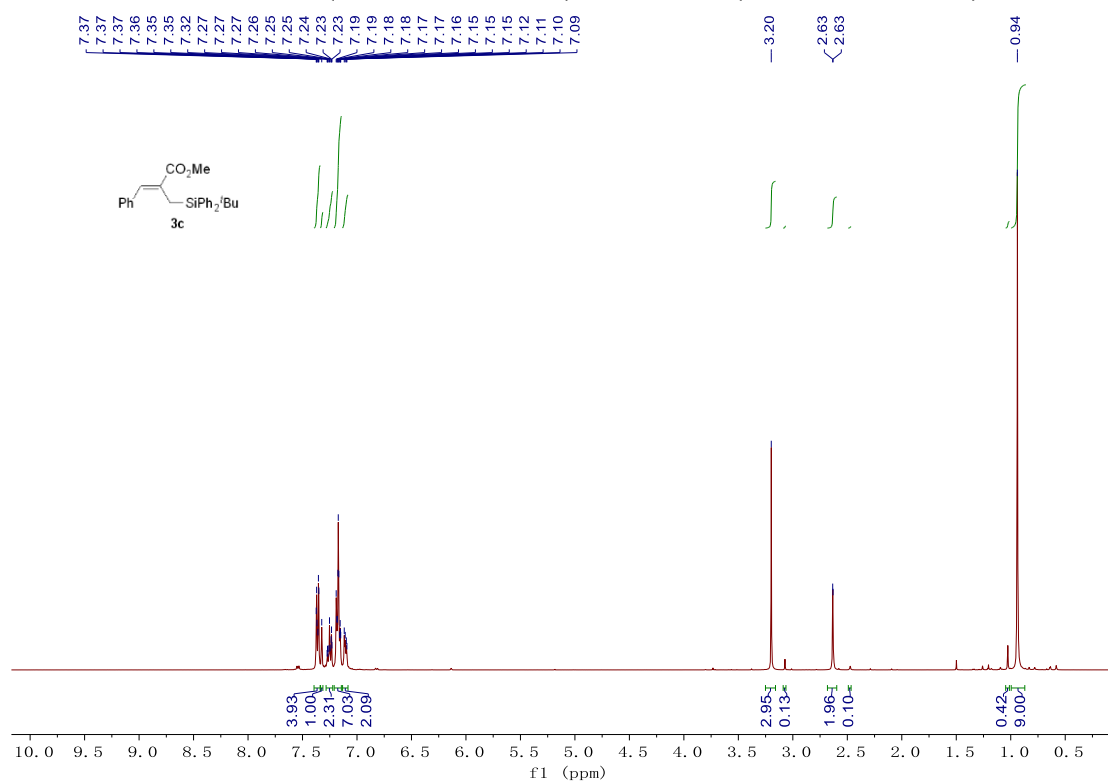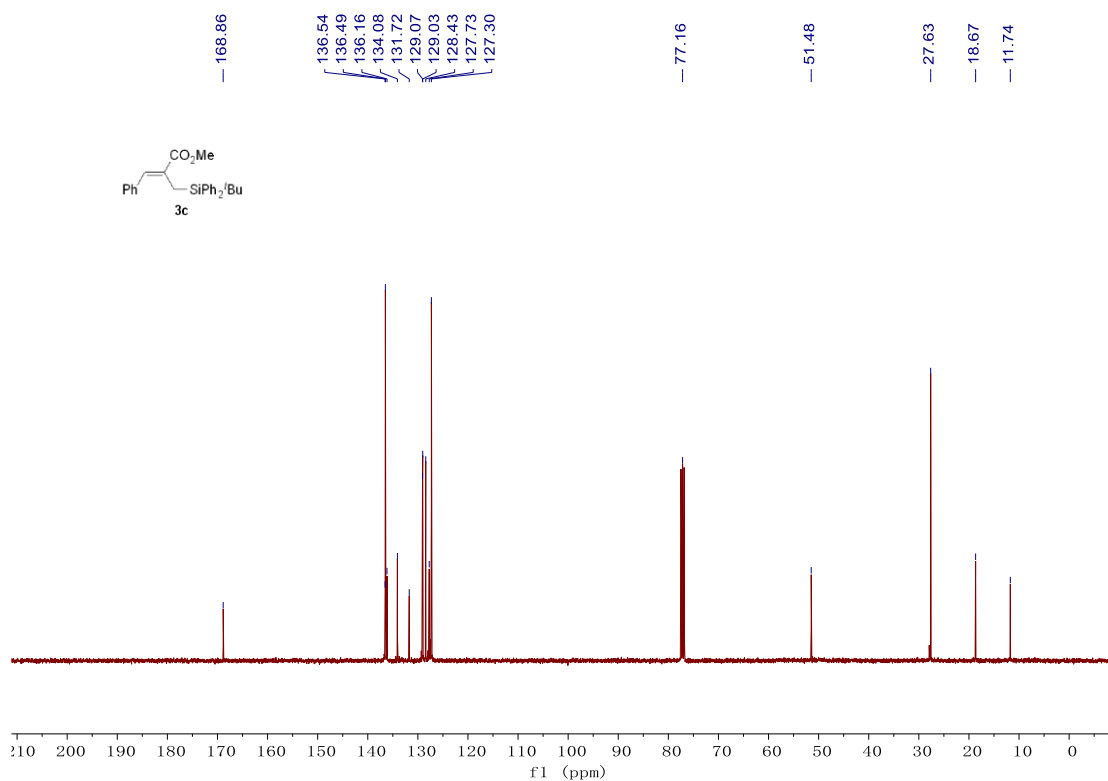

**3d;  $^1\text{H}$  NMR (400 MHz,  $\text{CDCl}_3$ );  $^{13}\text{C}$  NMR (100 MHz,  $\text{CDCl}_3$ )**

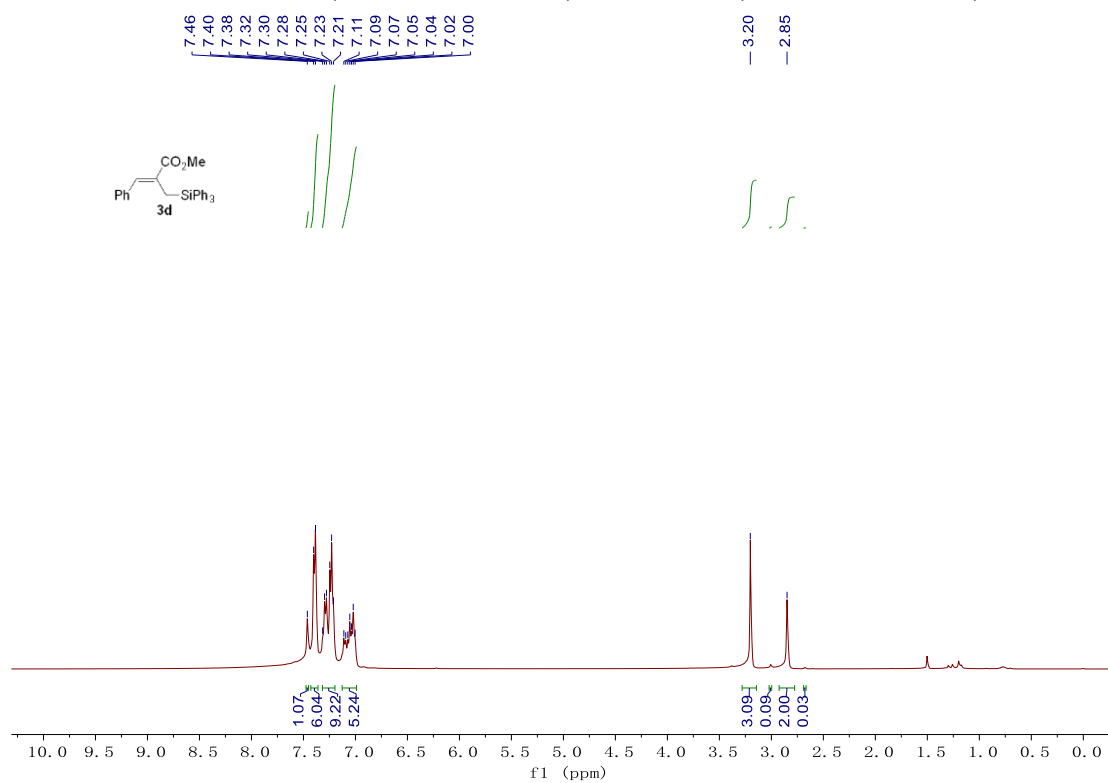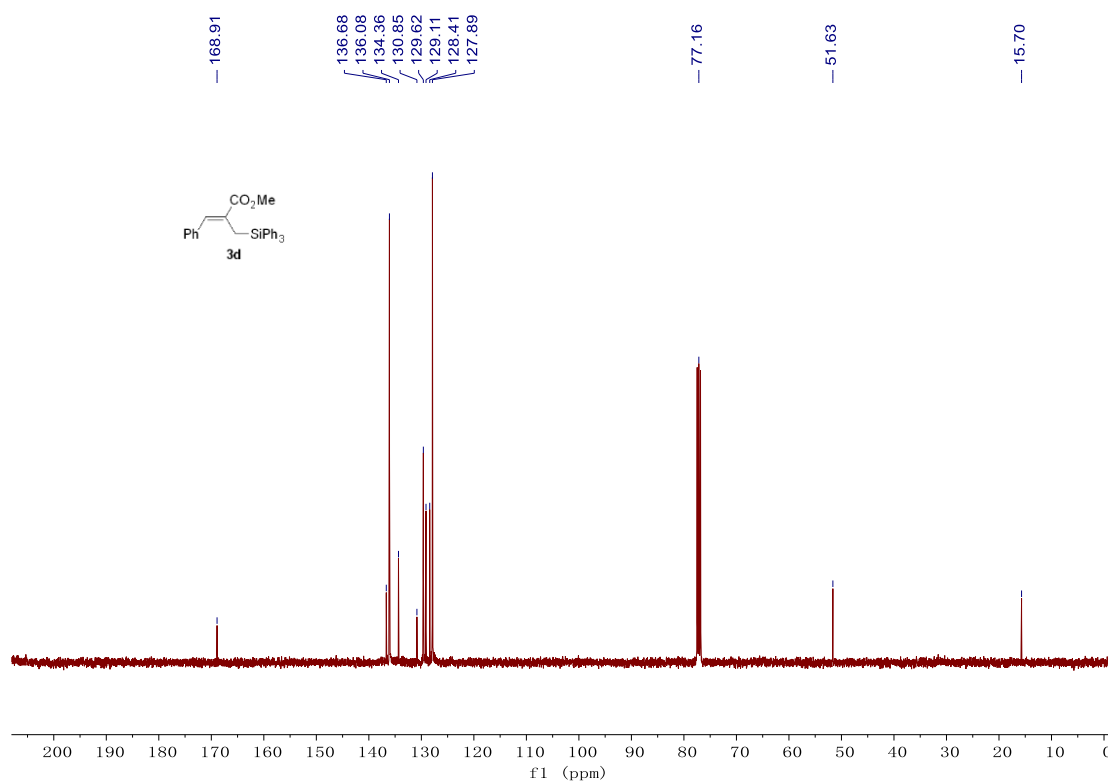

**3e;  $^1\text{H}$  NMR (400 MHz,  $\text{CDCl}_3$ );  $^{13}\text{C}$  NMR (100 MHz,  $\text{CDCl}_3$ )**

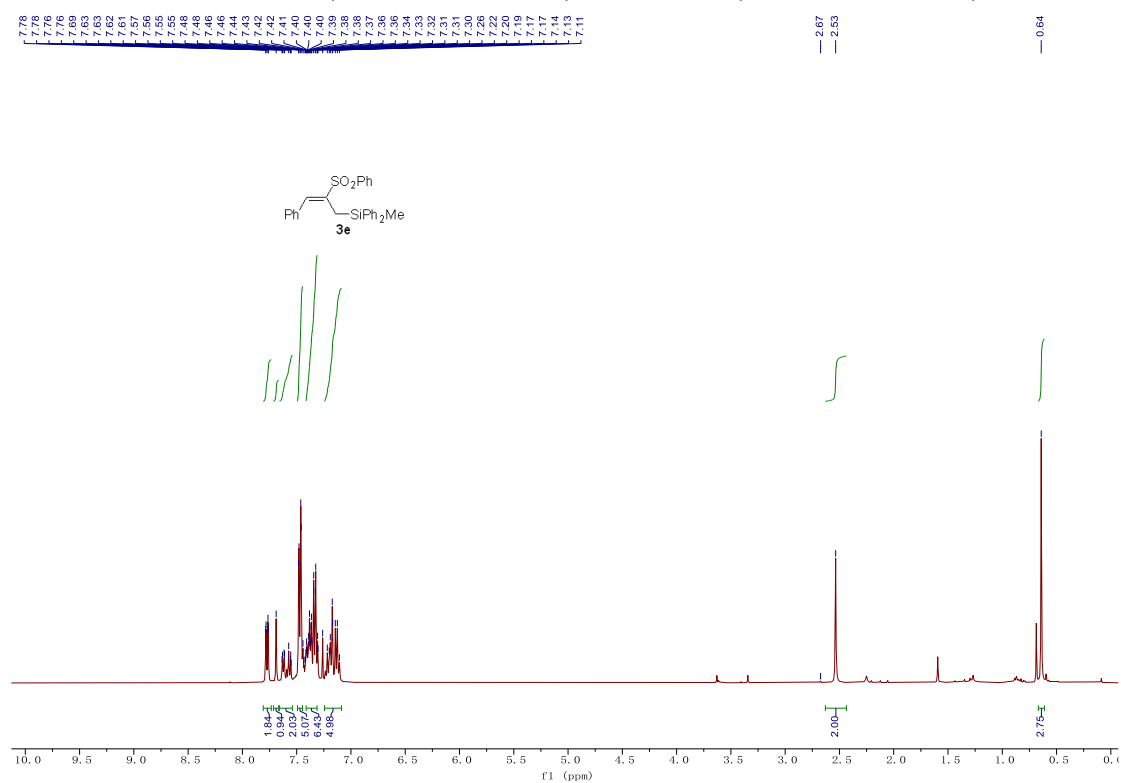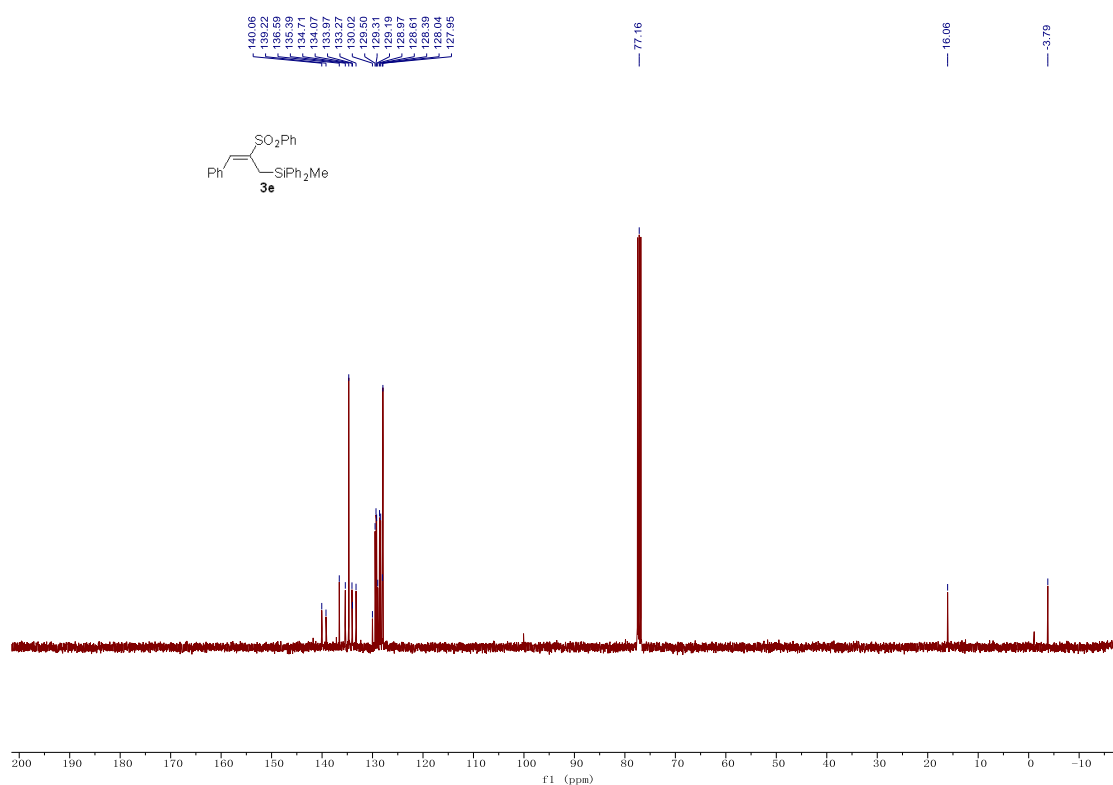

**3f;  $^1\text{H}$  NMR (400 MHz,  $\text{CDCl}_3$ );  $^{13}\text{C}$  NMR (100 MHz,  $\text{CDCl}_3$ );  
 $^{31}\text{P}$  NMR (162 MHz,  $\text{CDCl}_3$ )**

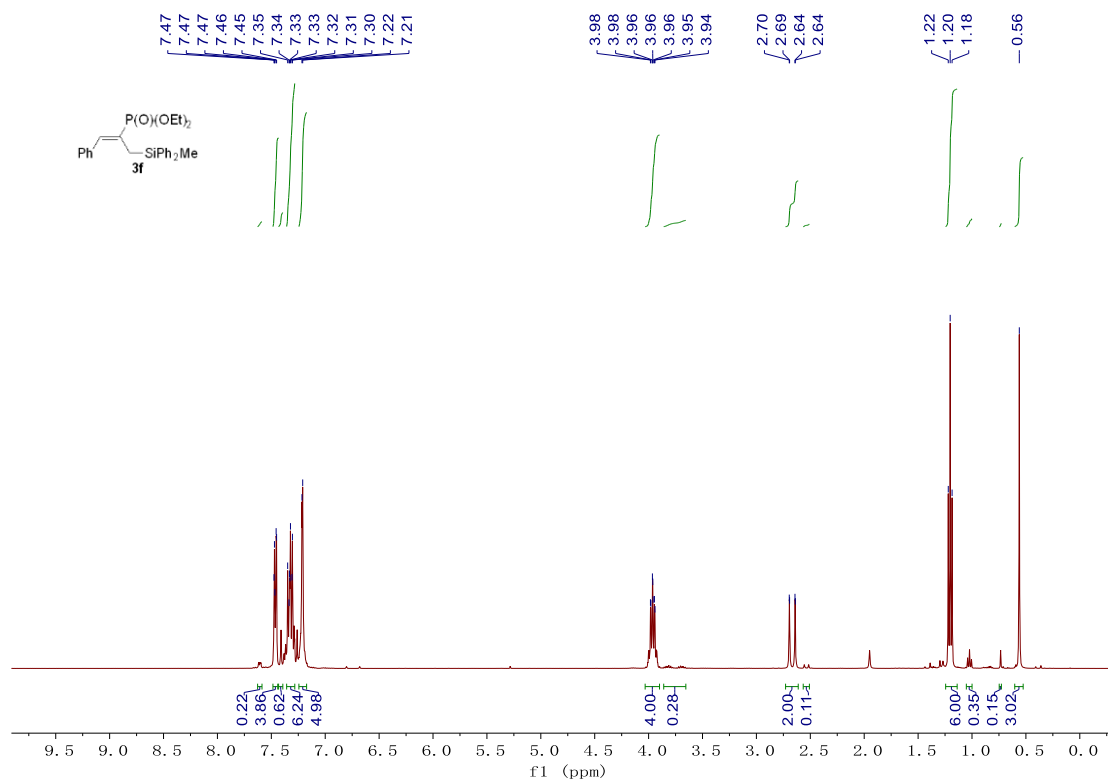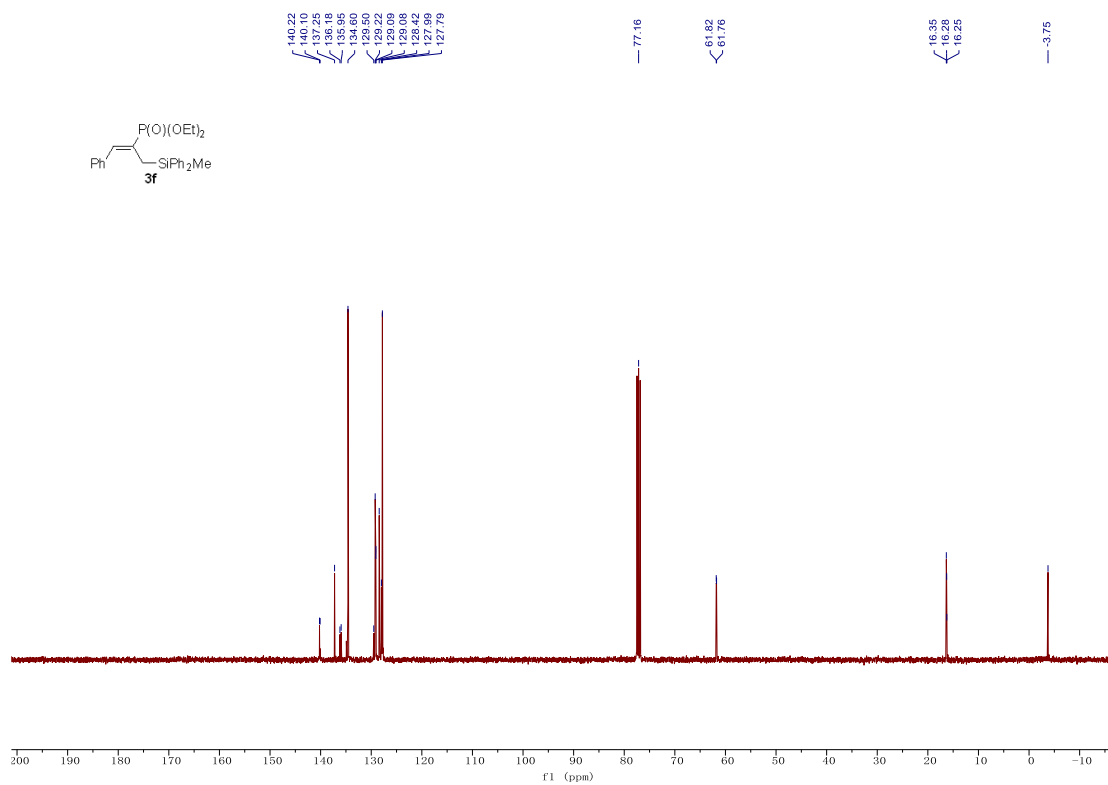

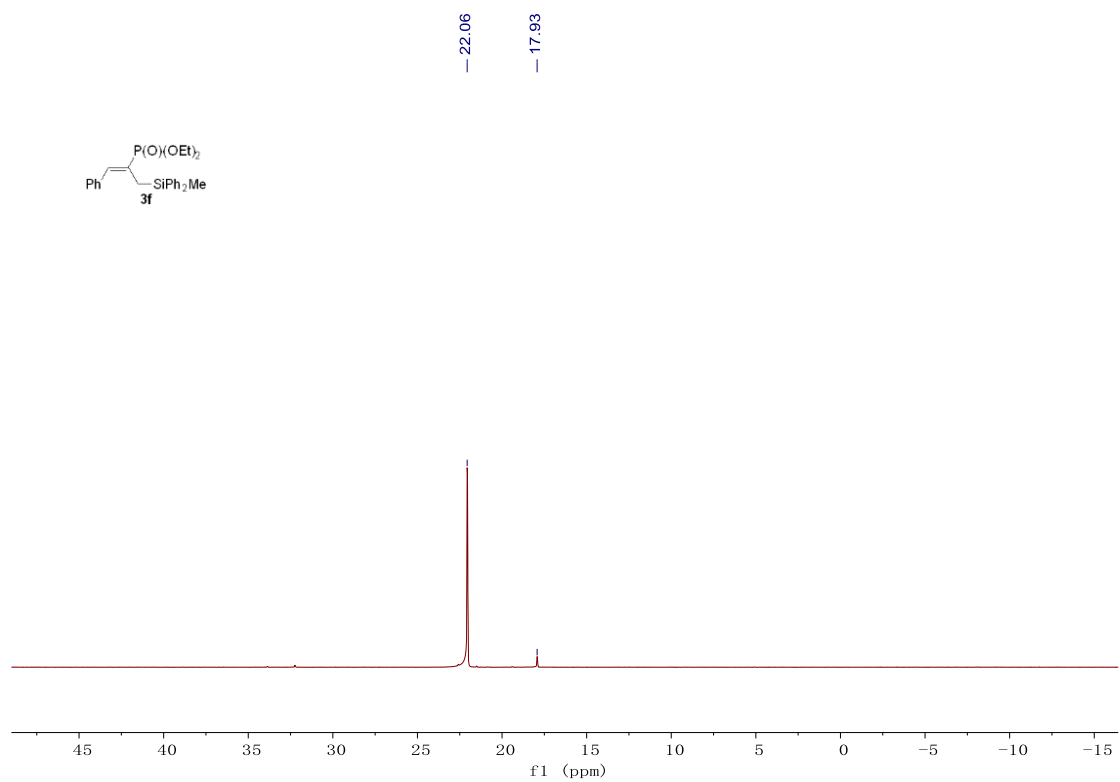

**3g;  $^1\text{H}$  NMR (400 MHz,  $\text{CDCl}_3$ );  $^{13}\text{C}$  NMR (100 MHz,  $\text{CDCl}_3$ )**

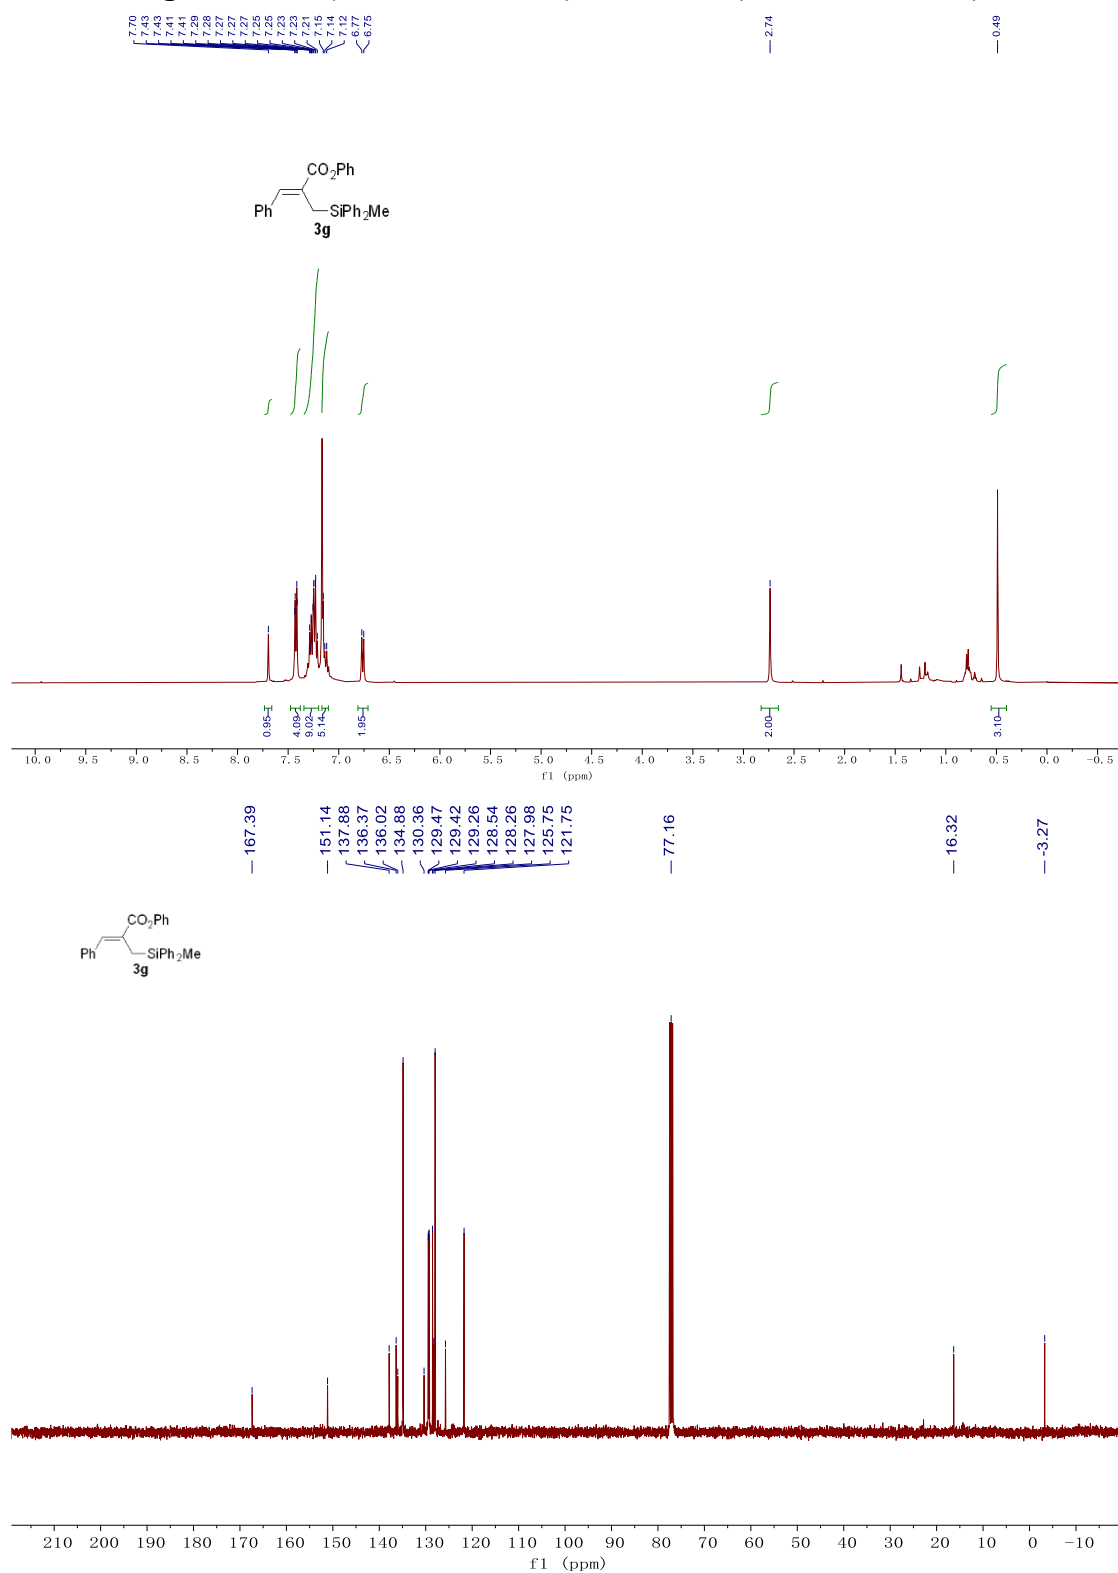

**3h;  $^1\text{H}$  NMR (400 MHz,  $\text{CDCl}_3$ );  $^{13}\text{C}$  NMR (100 MHz,  $\text{CDCl}_3$ )**

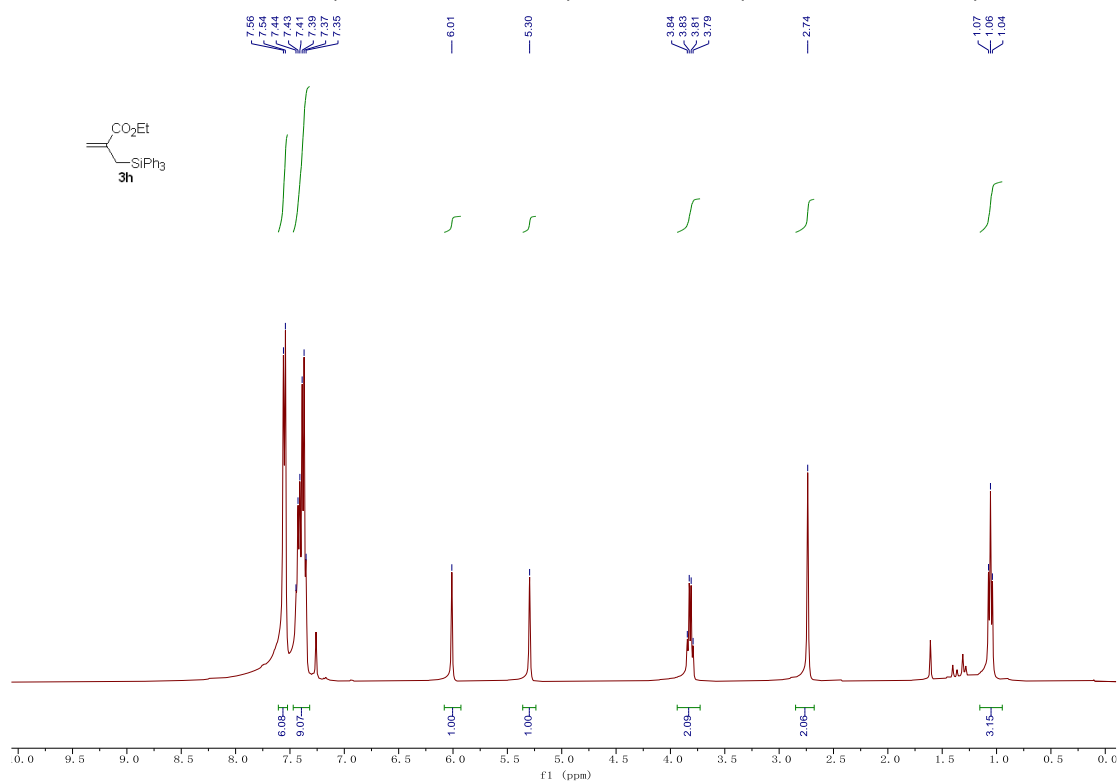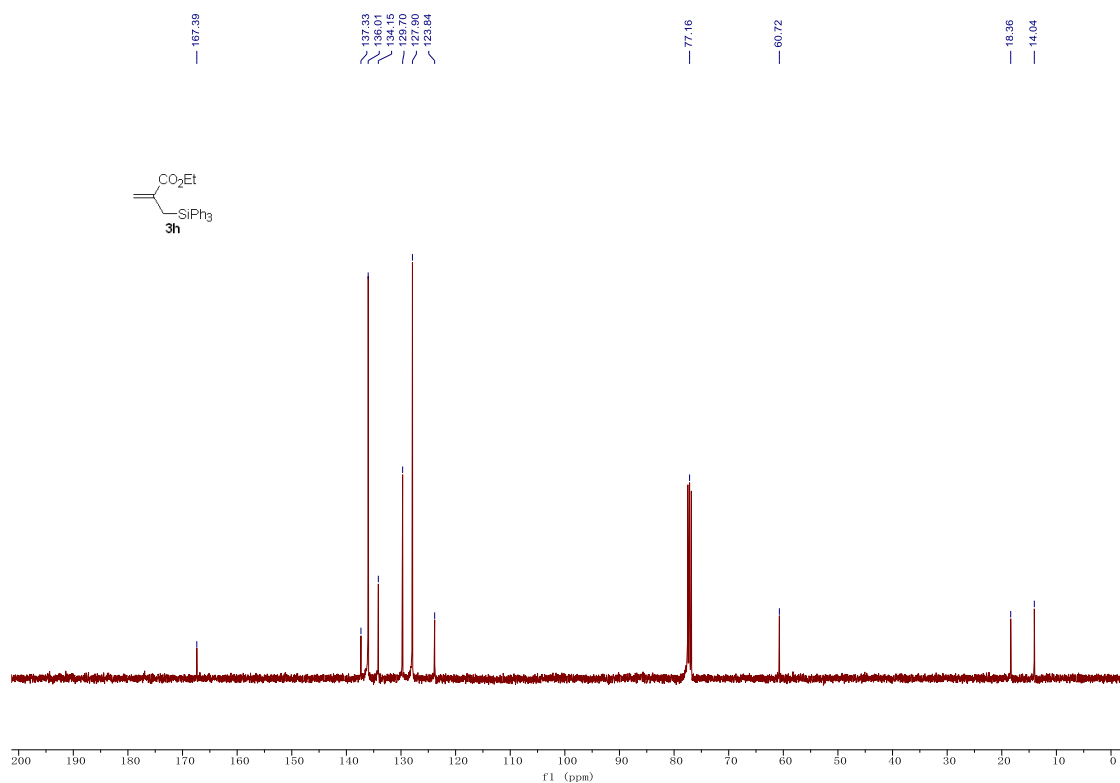

**3i;  $^1\text{H}$  NMR (400 MHz,  $\text{CDCl}_3$ );  $^{13}\text{C}$  NMR (100 MHz,  $\text{CDCl}_3$ )**

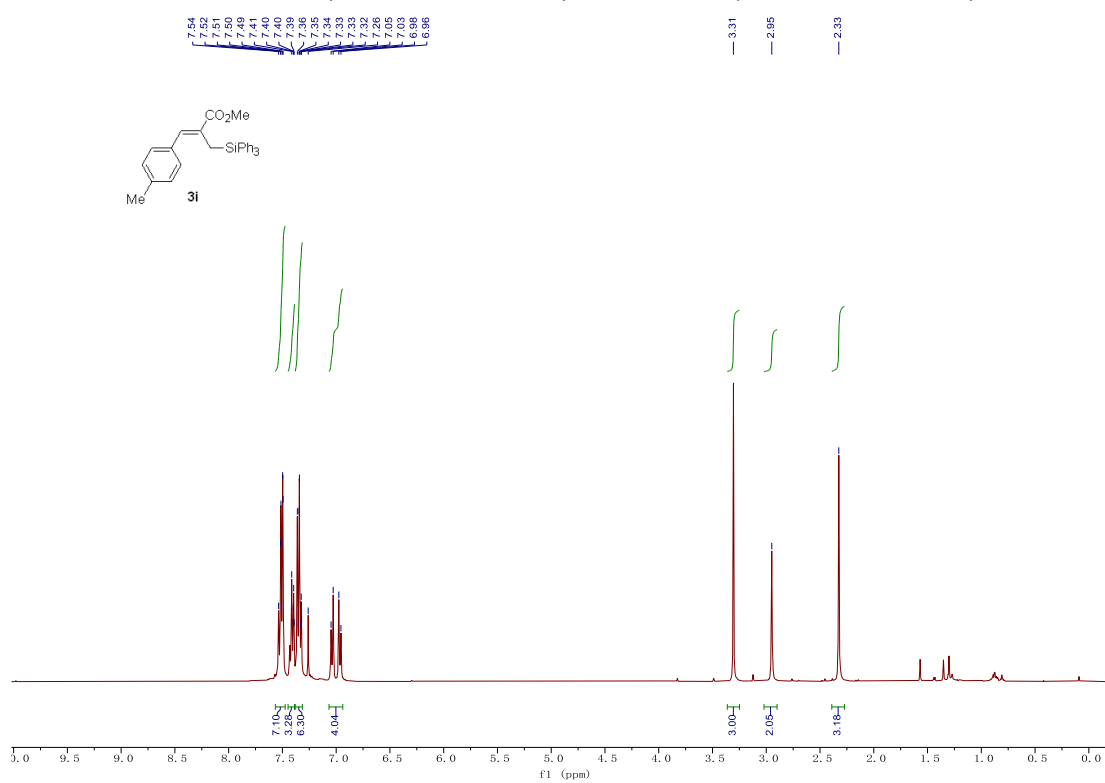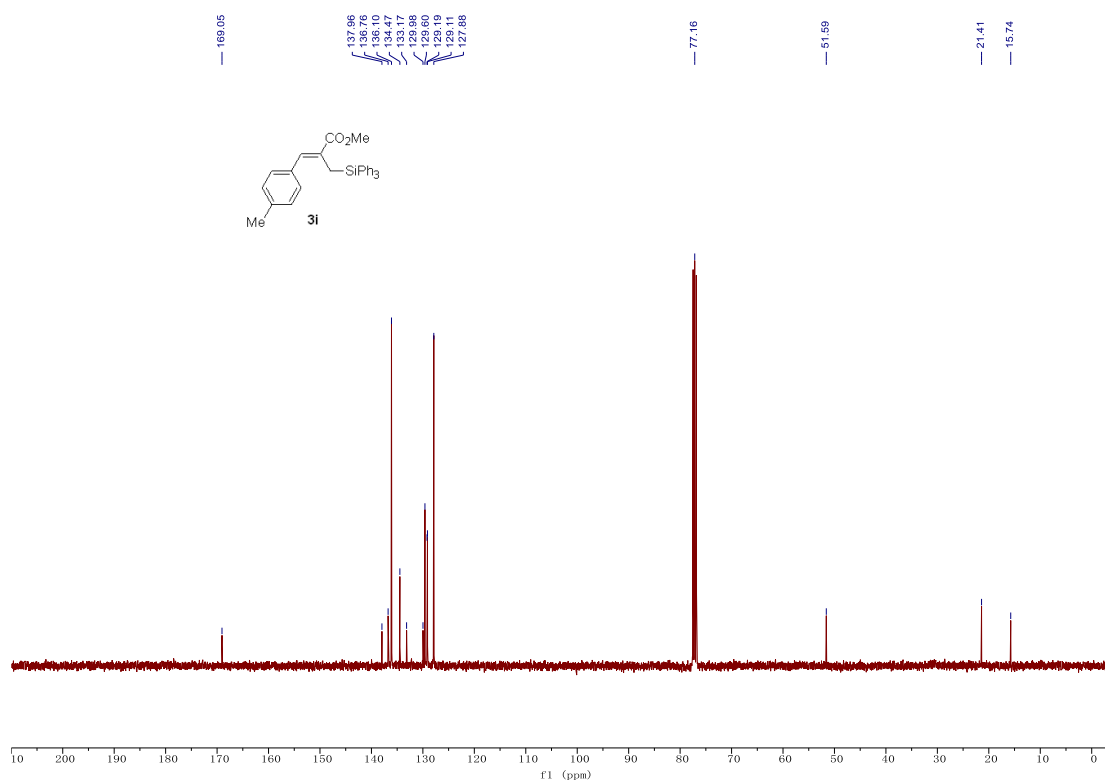

**3j;  $^1\text{H}$  NMR (400 MHz,  $\text{CDCl}_3$ );  $^{13}\text{C}$  NMR (100 MHz,  $\text{CDCl}_3$ );  
 $^{19}\text{F}$  NMR (471 MHz,  $\text{CDCl}_3$ )**

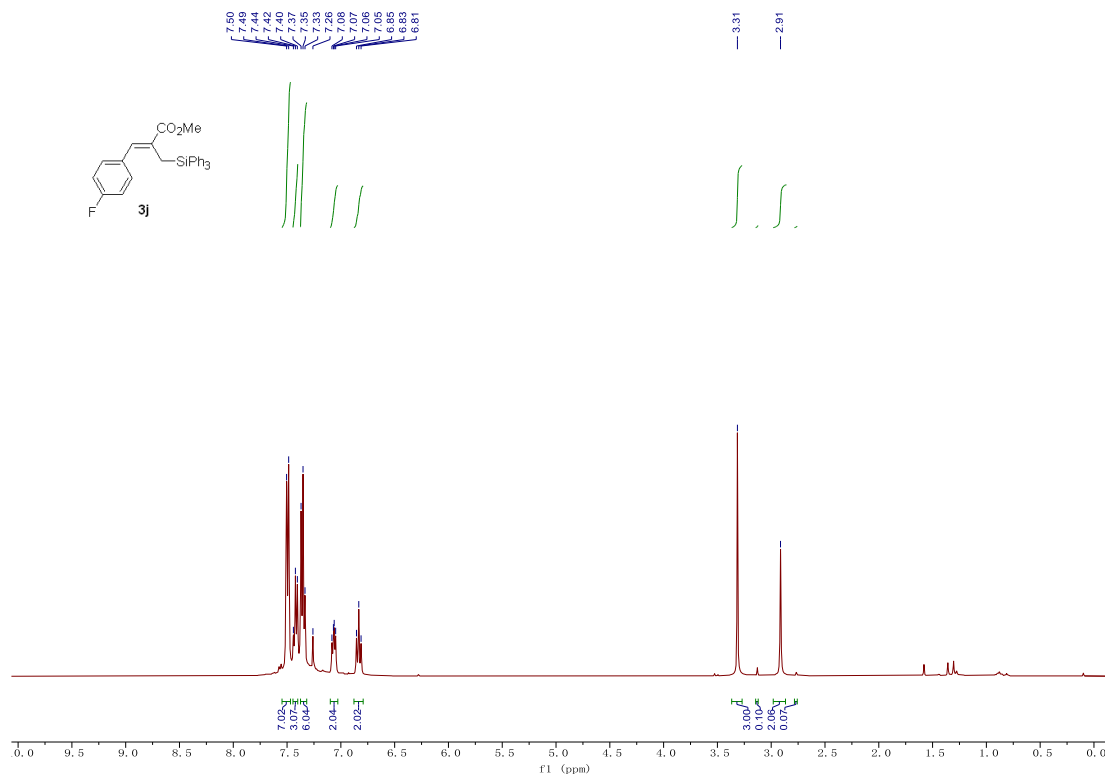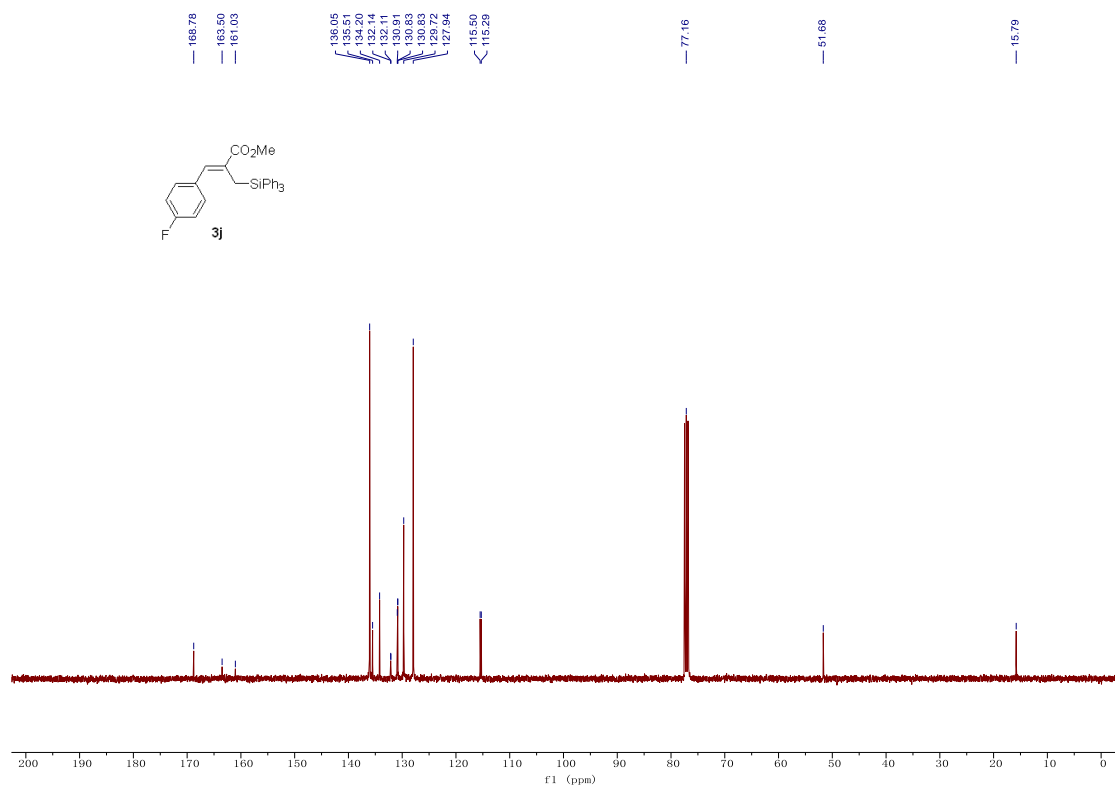

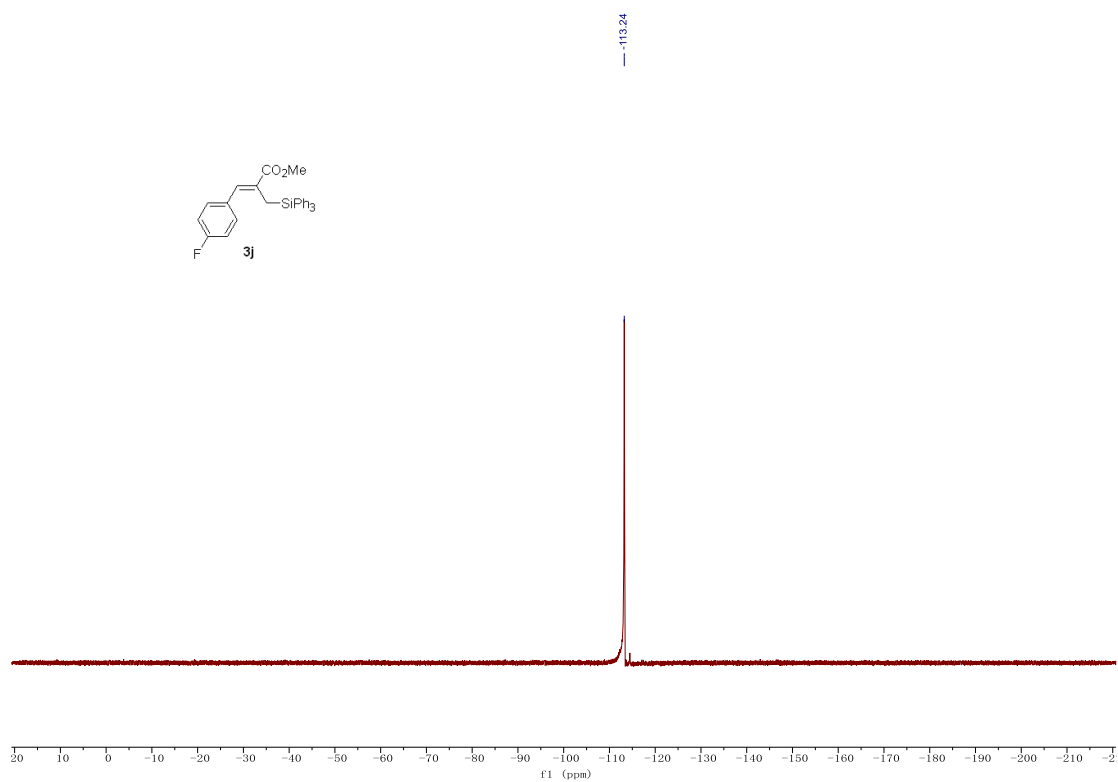

**3k;  $^1\text{H}$  NMR (400 MHz,  $\text{CDCl}_3$ );  $^{13}\text{C}$  NMR (100 MHz,  $\text{CDCl}_3$ )**

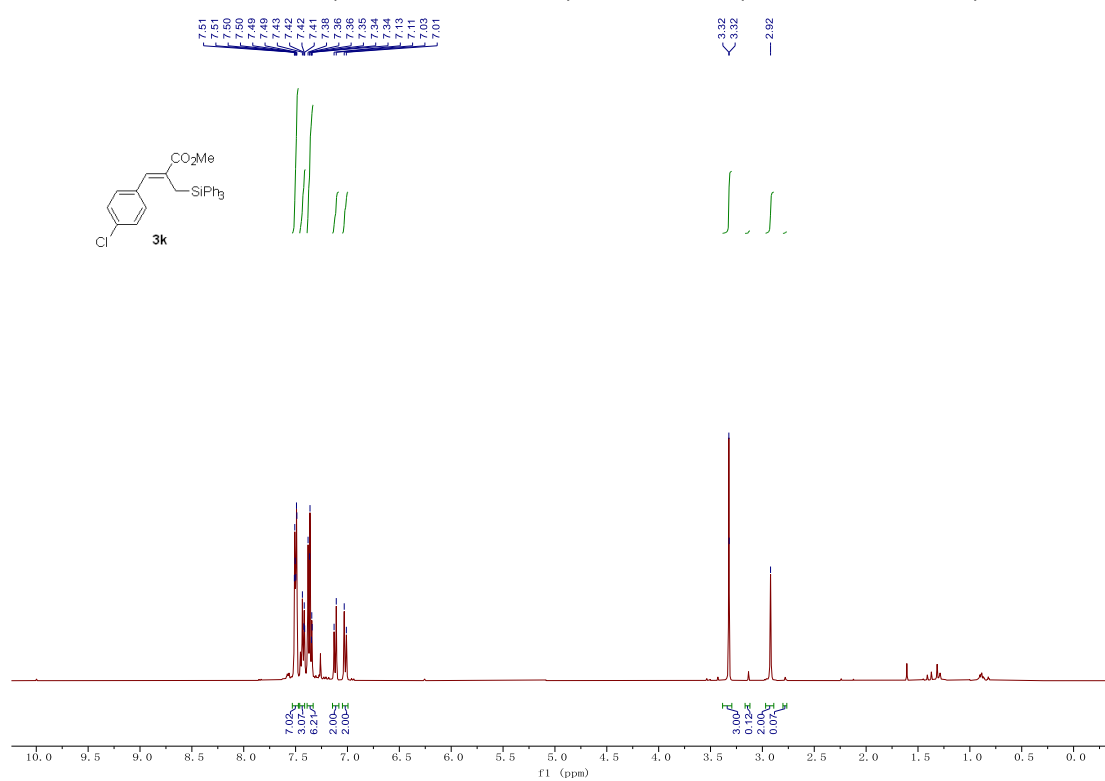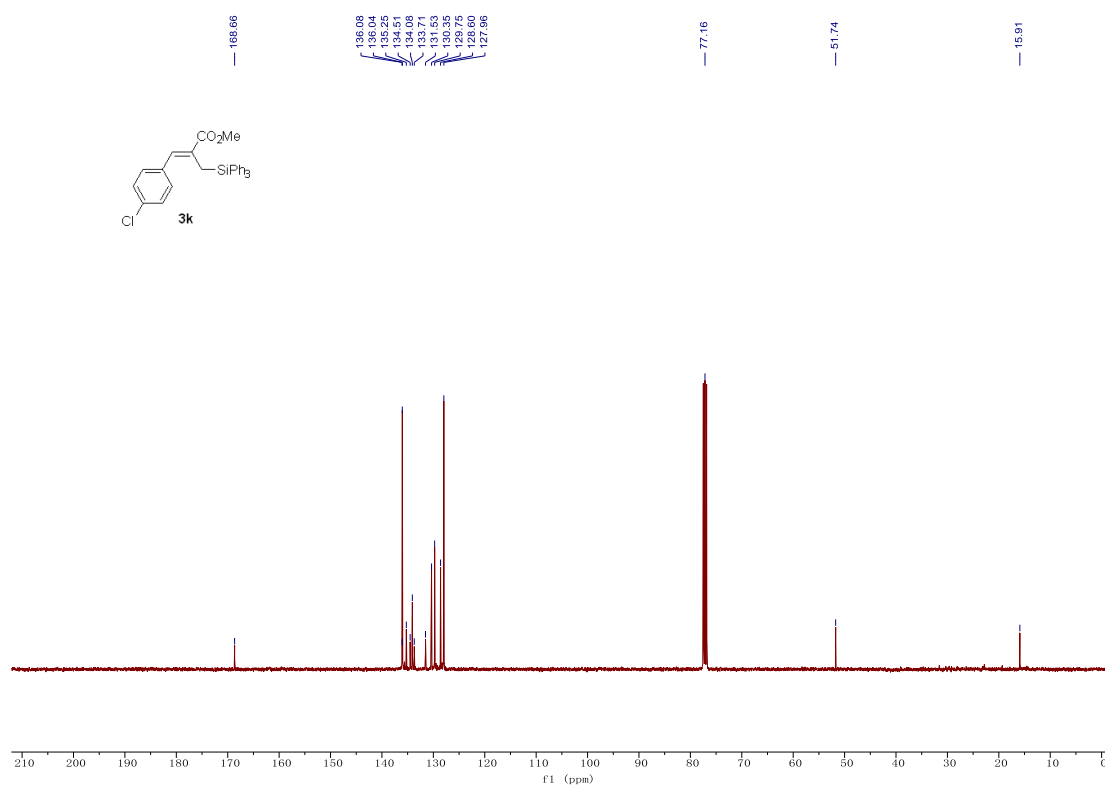

**3l;  $^1\text{H}$  NMR (400 MHz,  $\text{CDCl}_3$ );  $^{13}\text{C}$  NMR (100 MHz,  $\text{CDCl}_3$ )**

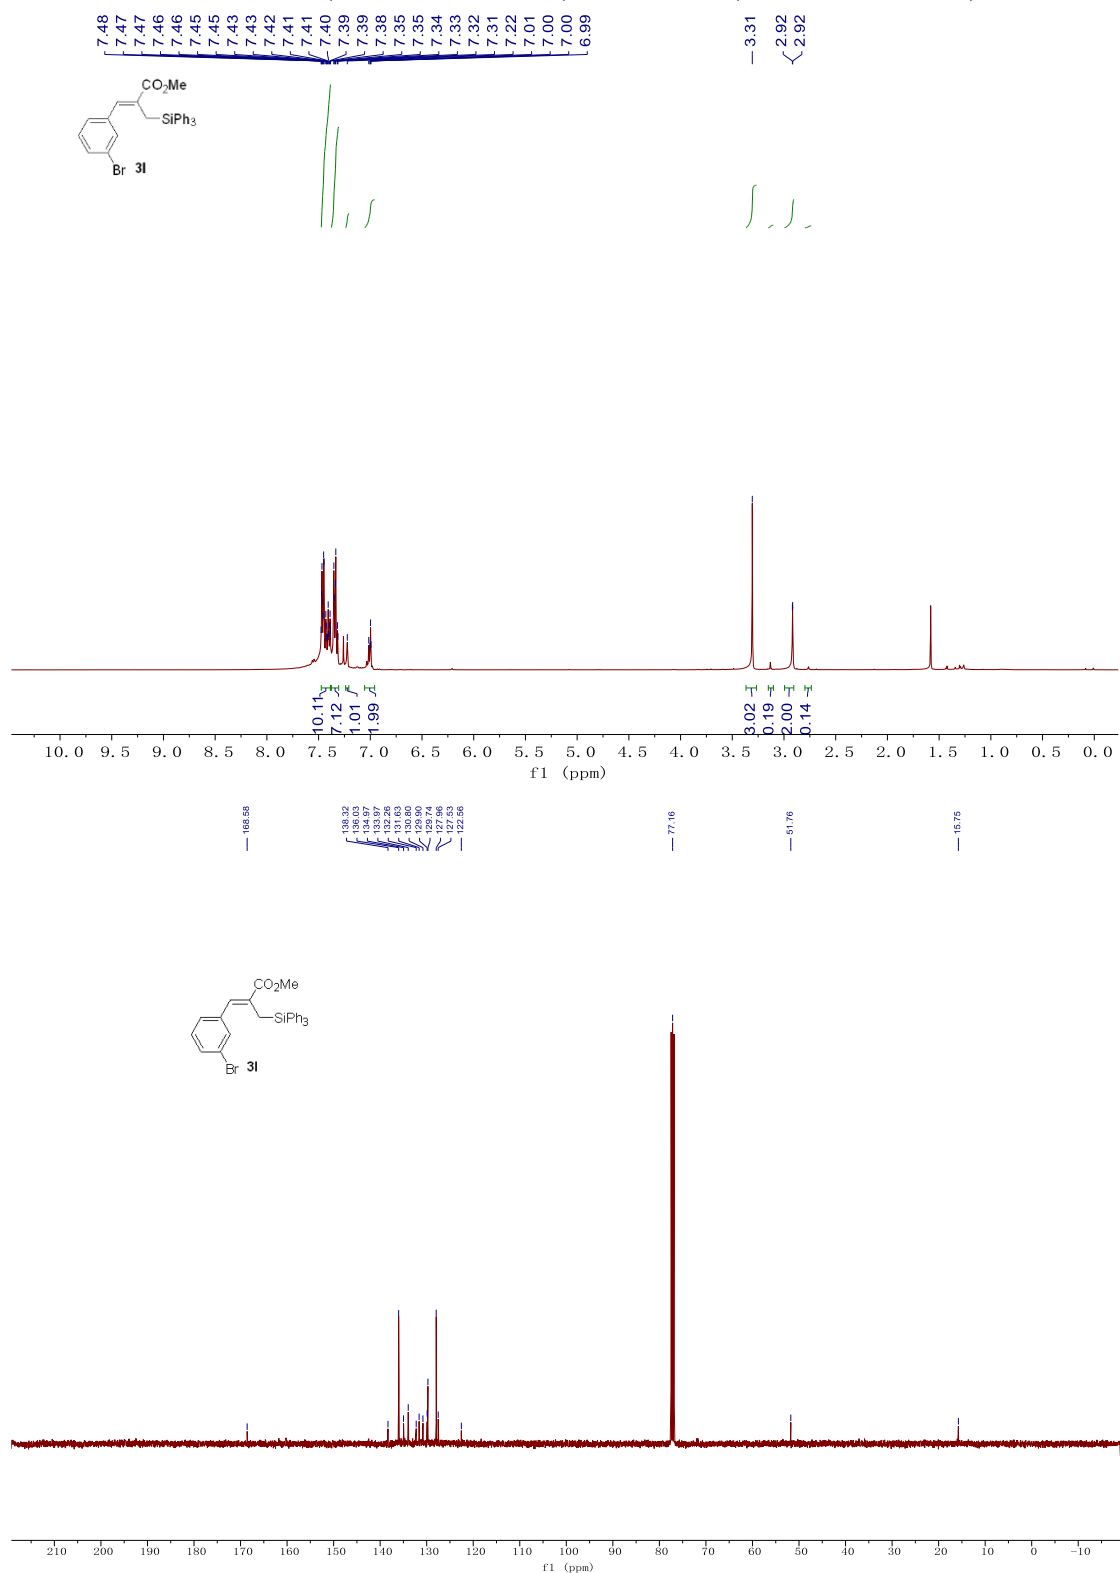

**3m;  $^1\text{H}$  NMR (400 MHz,  $\text{CDCl}_3$ );  $^{13}\text{C}$  NMR (100 MHz,  $\text{CDCl}_3$ )**

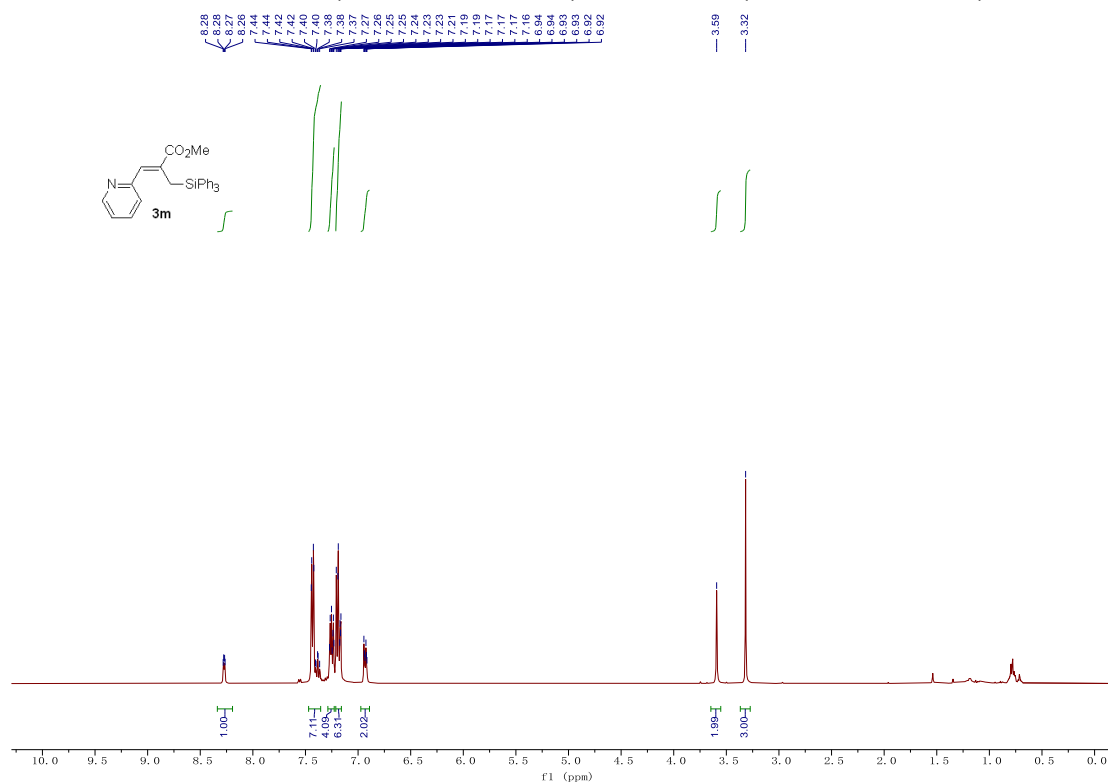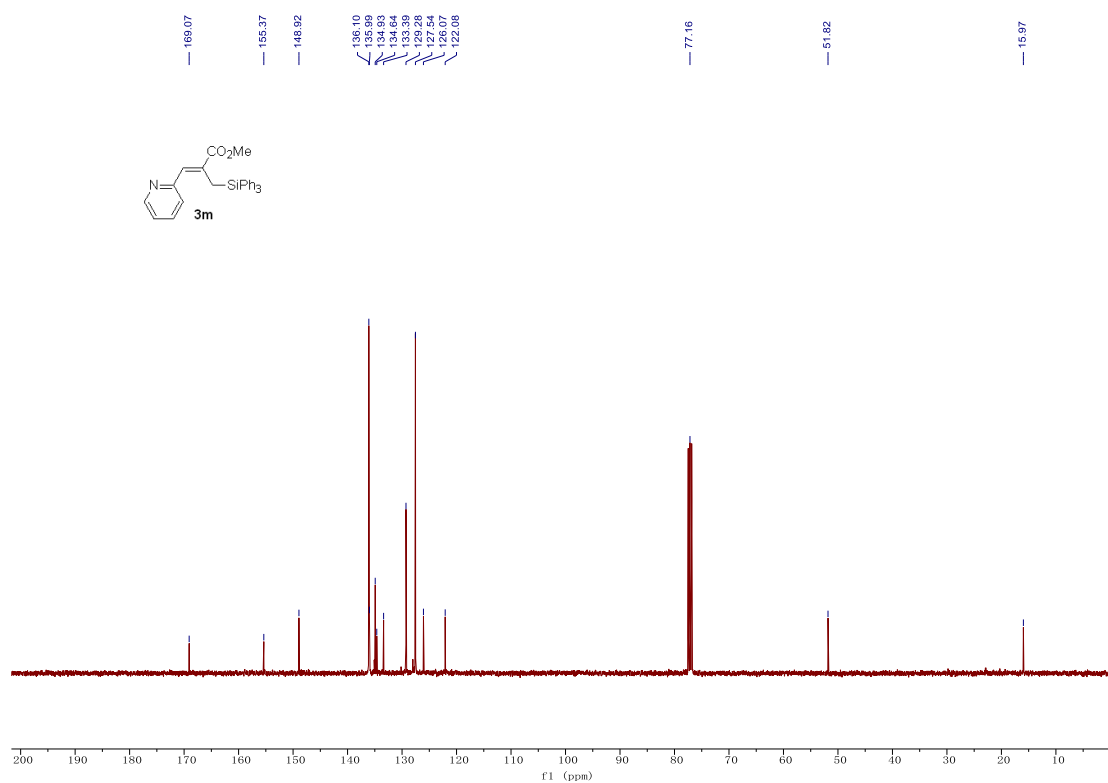

**3n;  $^1\text{H}$  NMR (400 MHz,  $\text{CDCl}_3$ );  $^{13}\text{C}$  NMR (100 MHz,  $\text{CDCl}_3$ )**

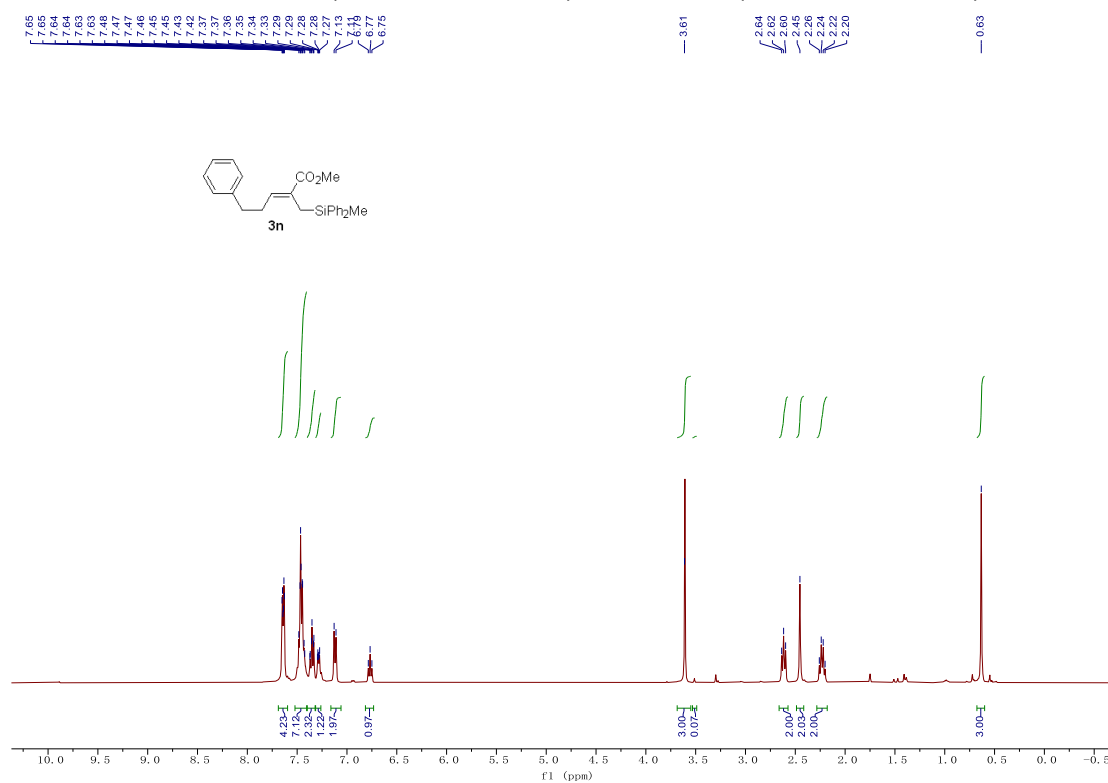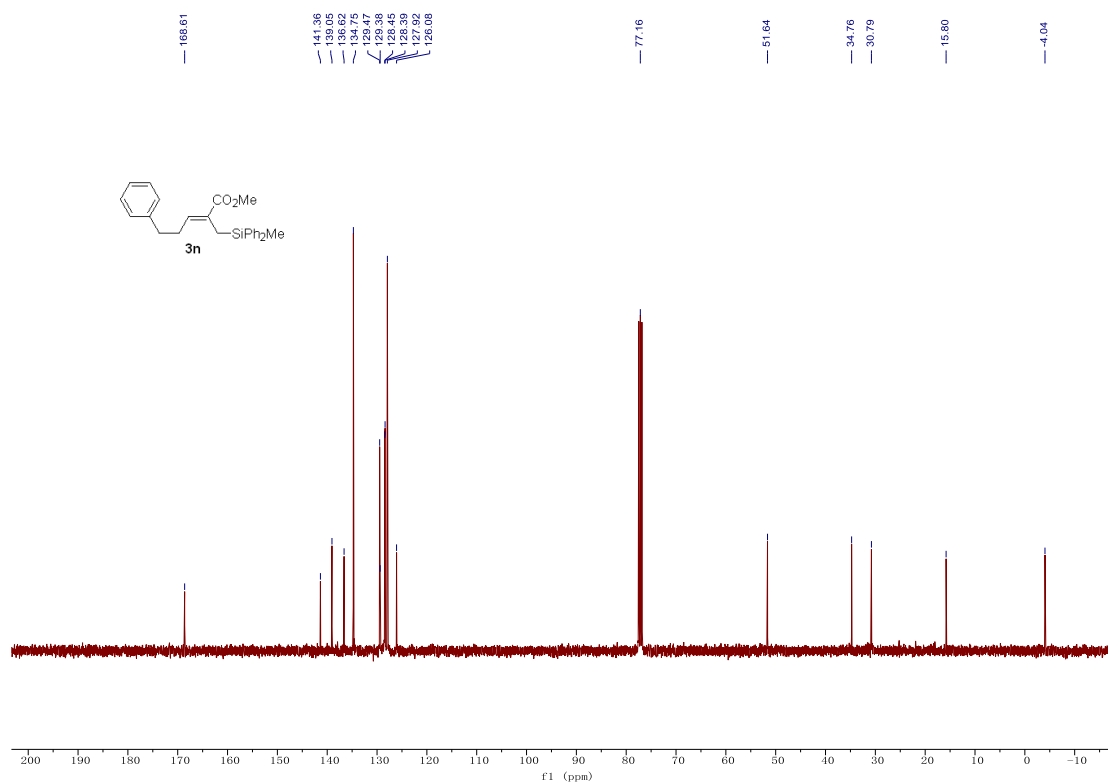

**3o;  $^1\text{H}$  NMR (400 MHz,  $\text{CDCl}_3$ );  $^{13}\text{C}$  NMR (100 MHz,  $\text{CDCl}_3$ )**

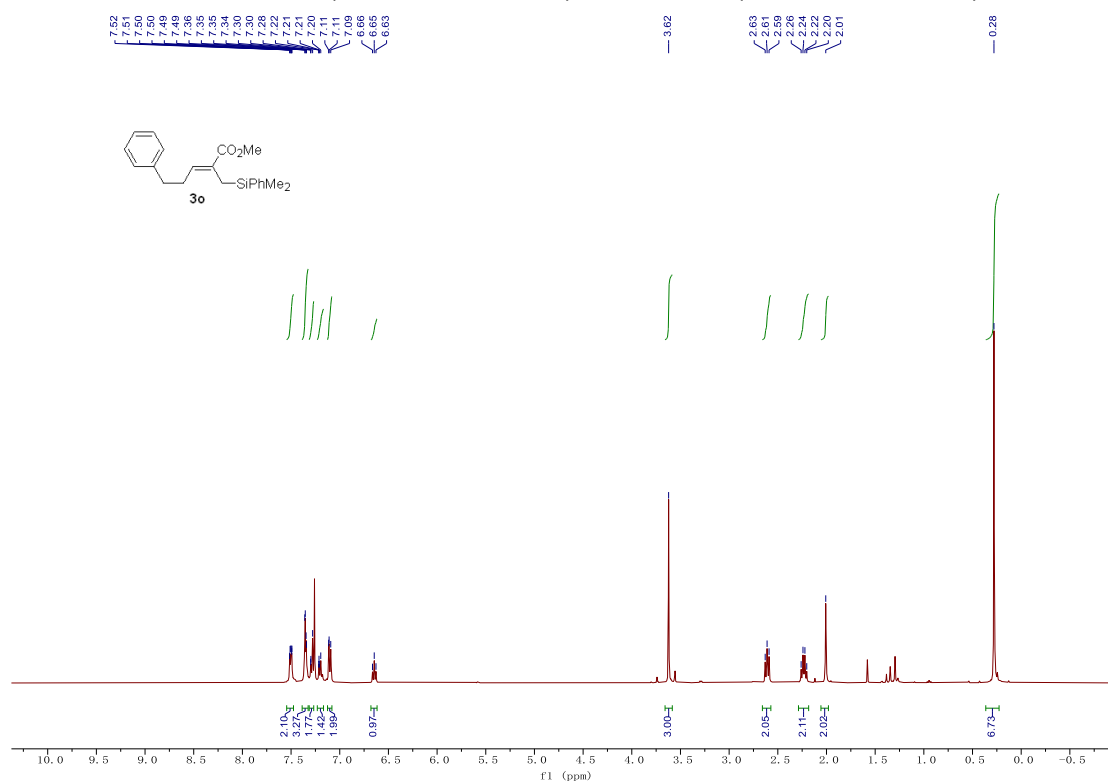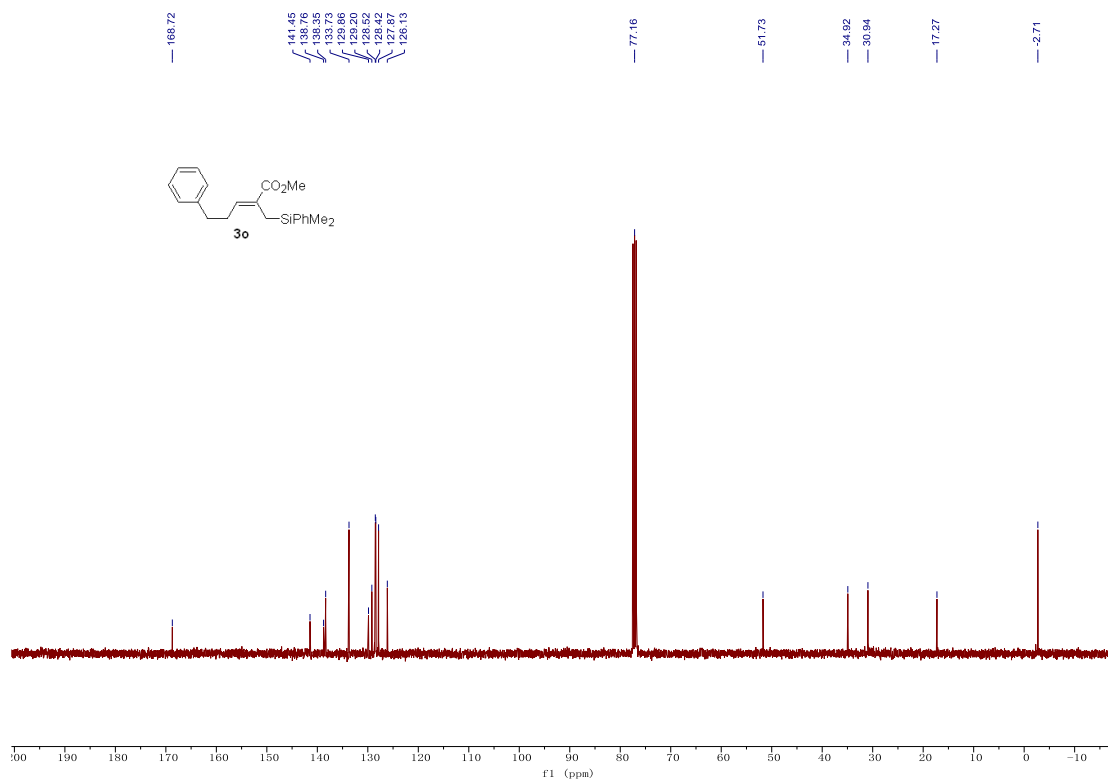

**3p;  $^1\text{H}$  NMR (400 MHz,  $\text{CDCl}_3$ );  $^{13}\text{C}$  NMR (100 MHz,  $\text{CDCl}_3$ )**

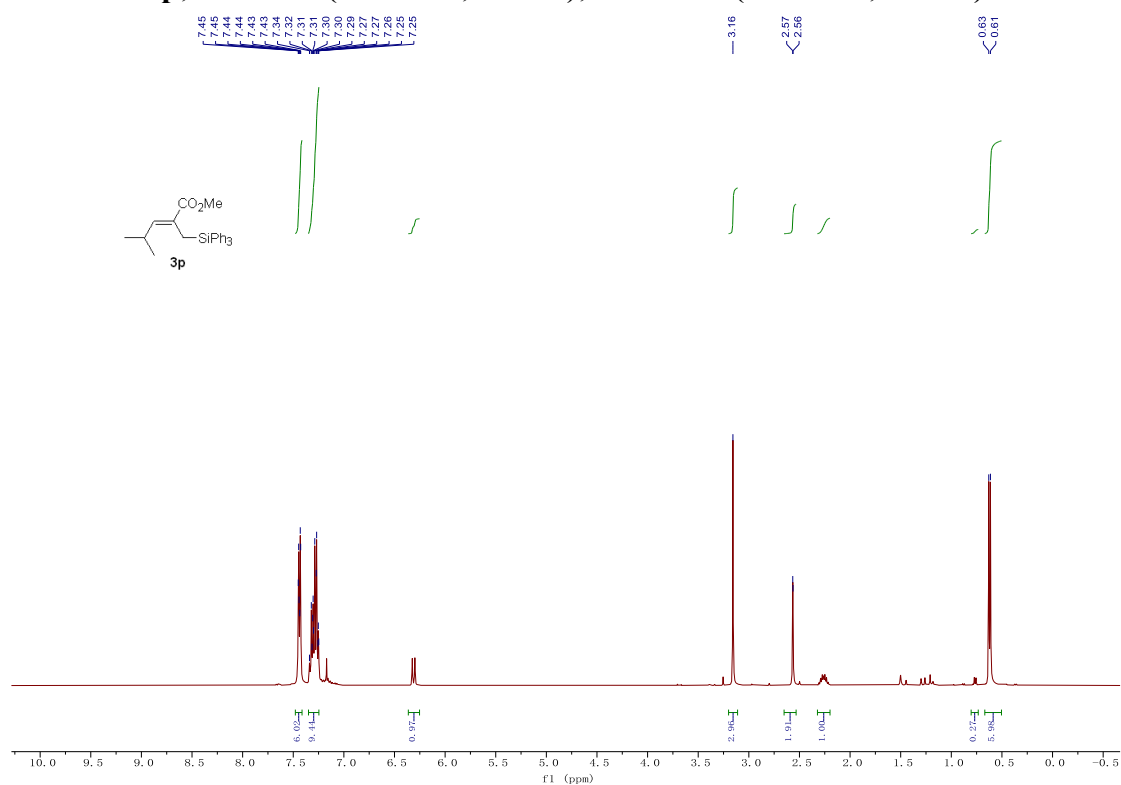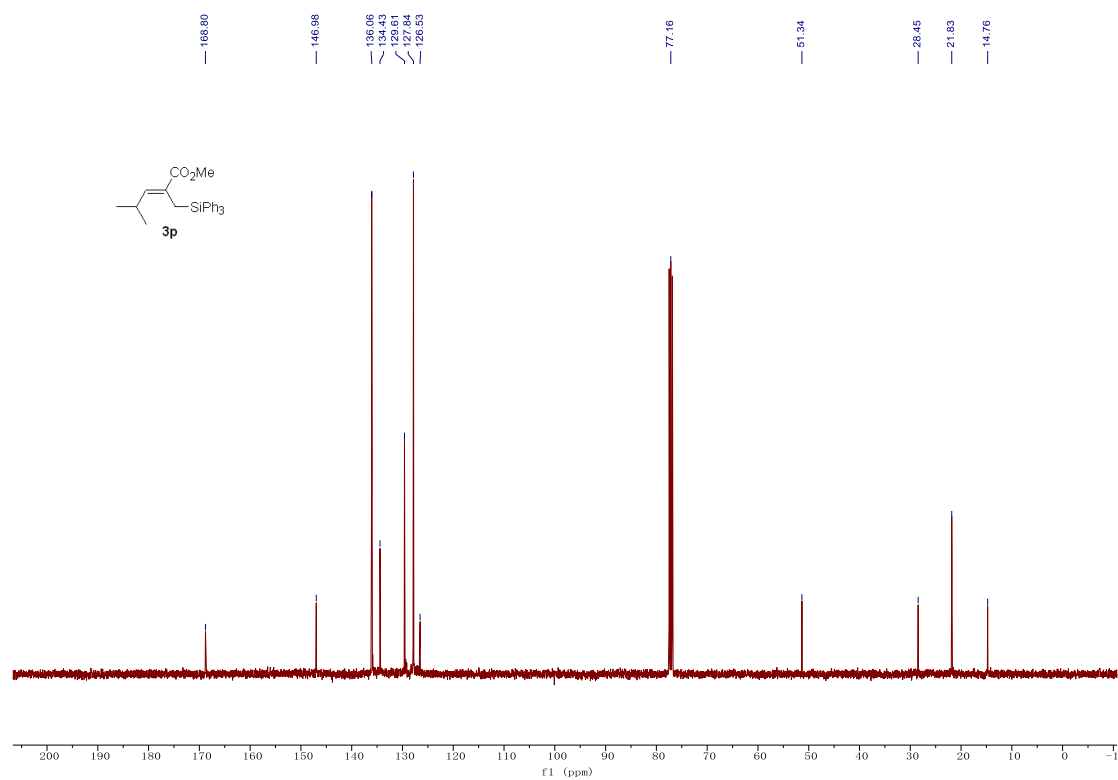

**5a;  $^1\text{H}$  NMR (400 MHz,  $\text{CDCl}_3$ );  $^{13}\text{C}$  NMR (100 MHz,  $\text{CDCl}_3$ )**

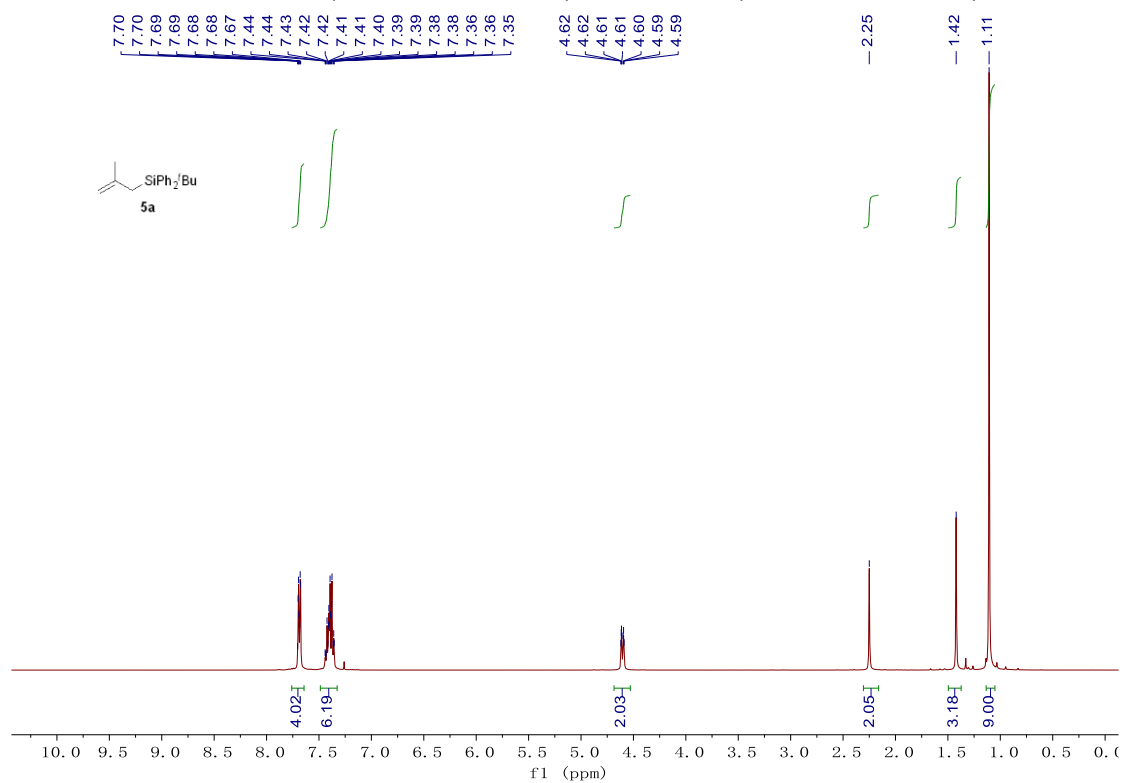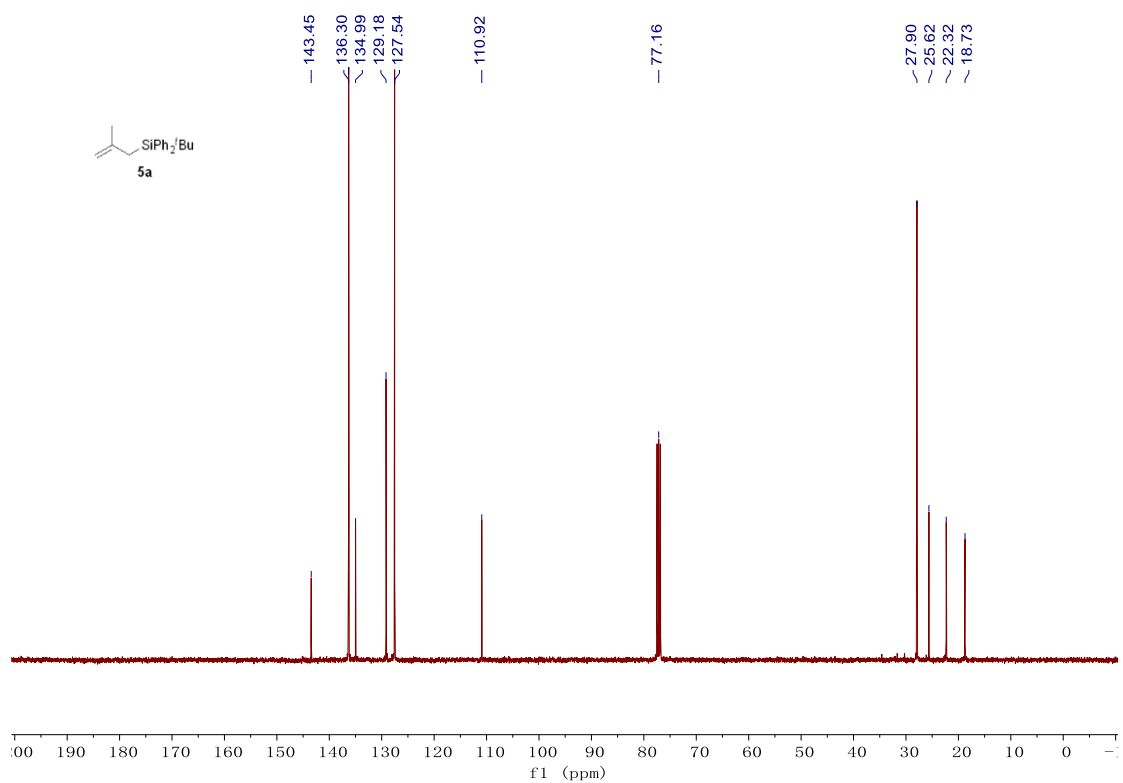

**5b;  $^1\text{H}$  NMR (400 MHz,  $\text{CDCl}_3$ );  $^{13}\text{C}$  NMR (100 MHz,  $\text{CDCl}_3$ )**

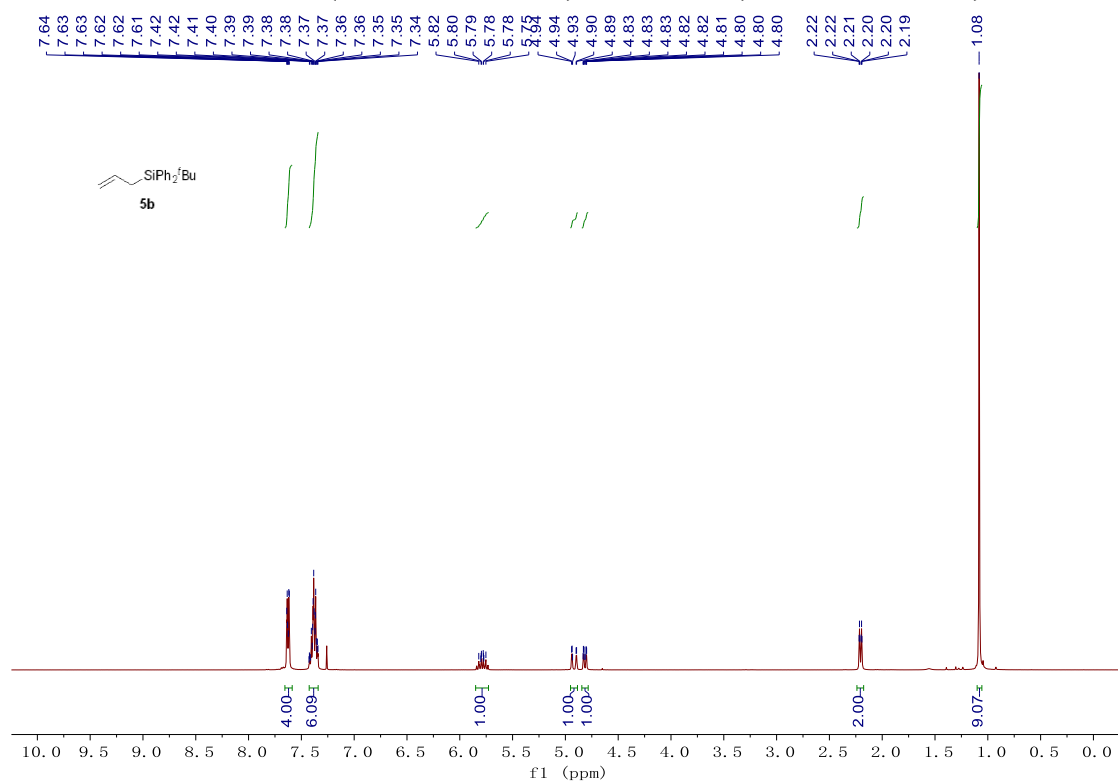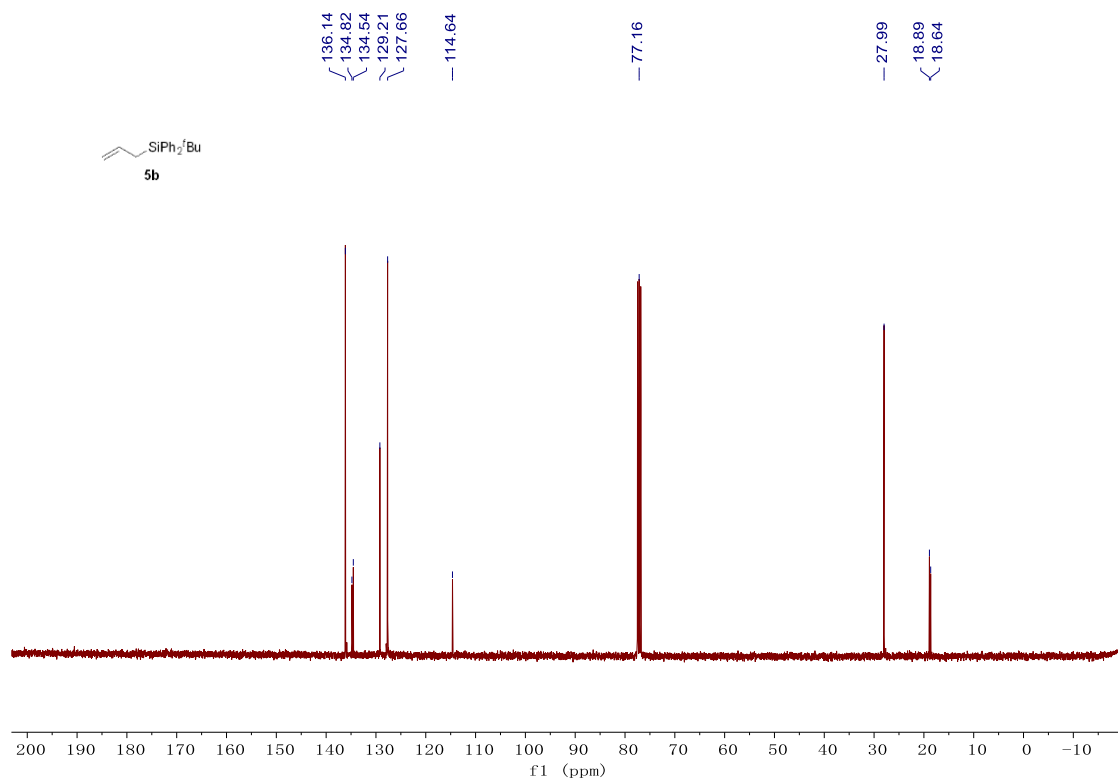

**5c;  $^1\text{H}$  NMR (400 MHz,  $\text{CDCl}_3$ );  $^{13}\text{C}$  NMR (100 MHz,  $\text{CDCl}_3$ )**

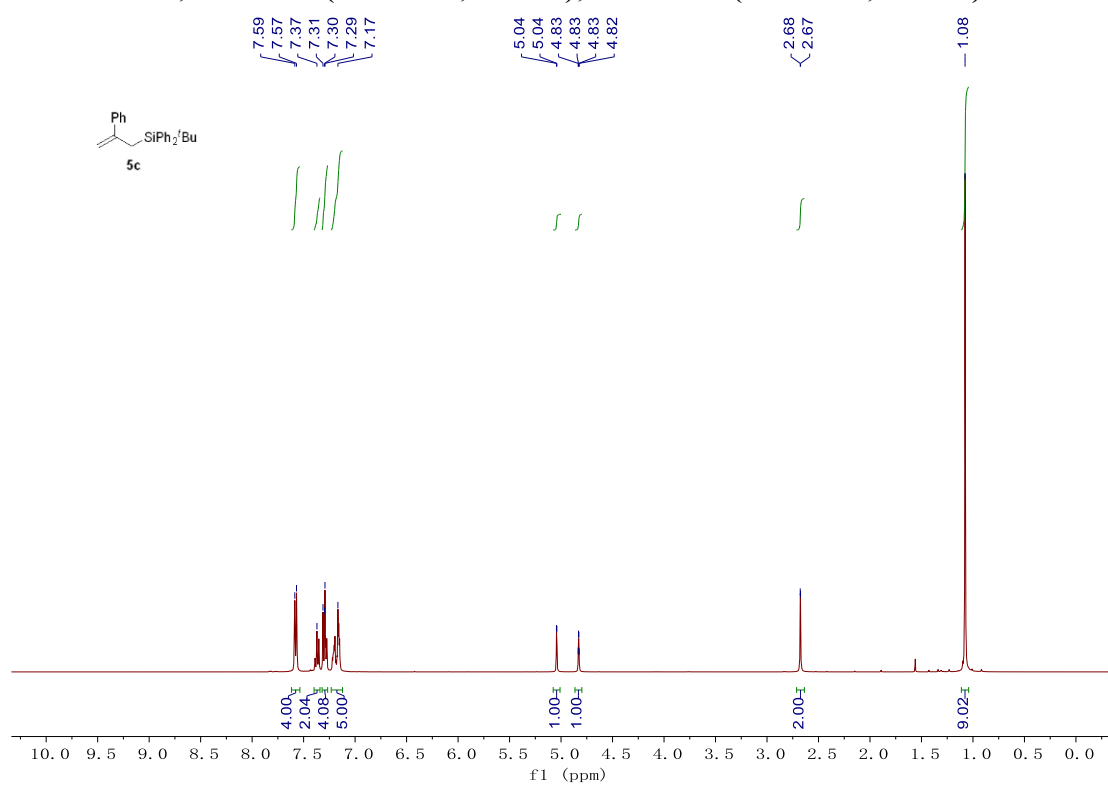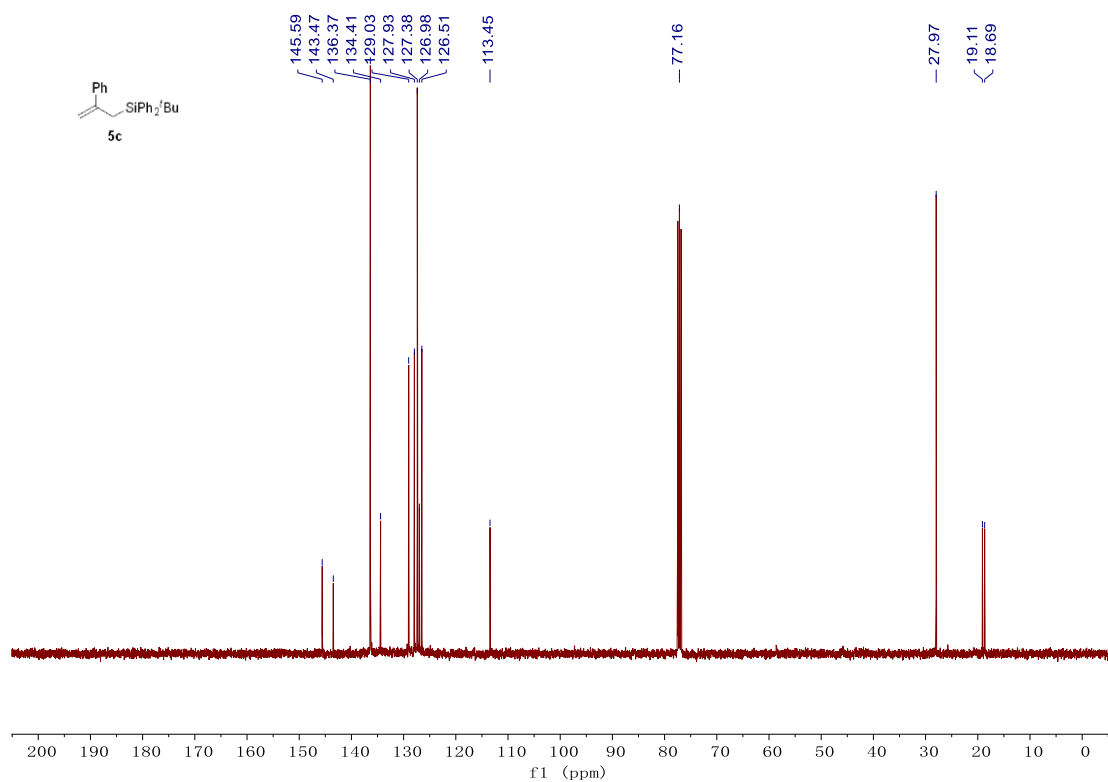

**5d**;  $^1\text{H}$  NMR (400 MHz,  $\text{CDCl}_3$ );  $^{13}\text{C}$  NMR (100 MHz,  $\text{CDCl}_3$ )

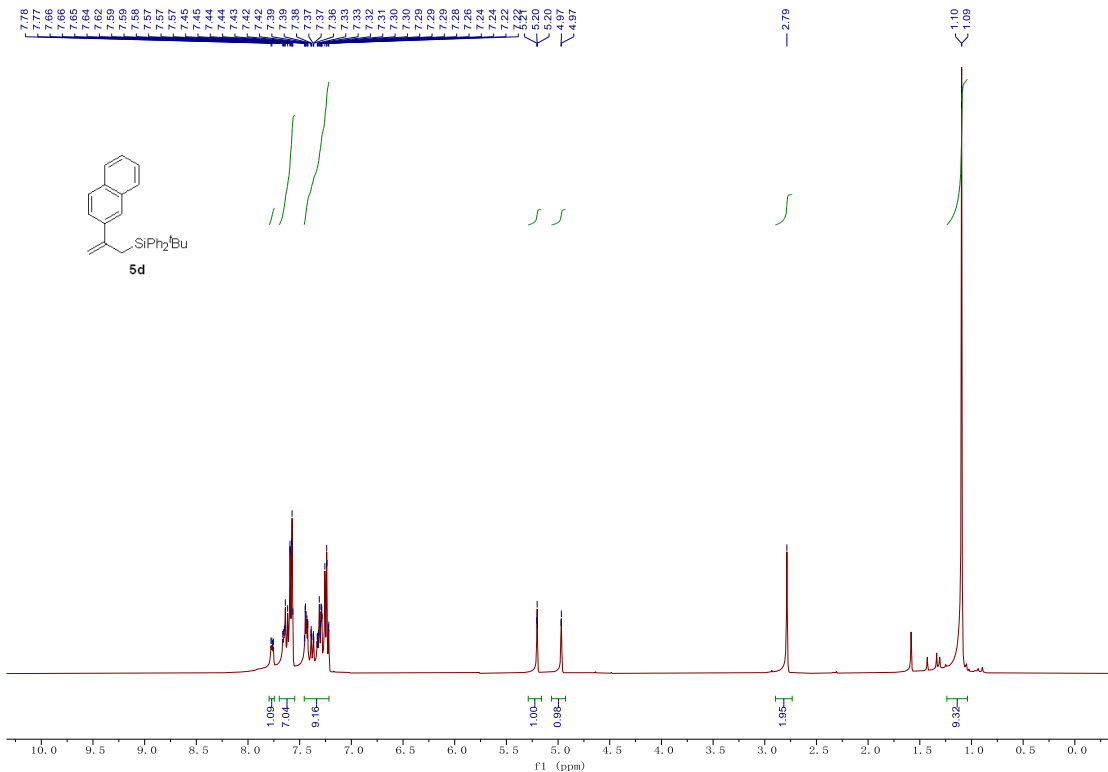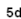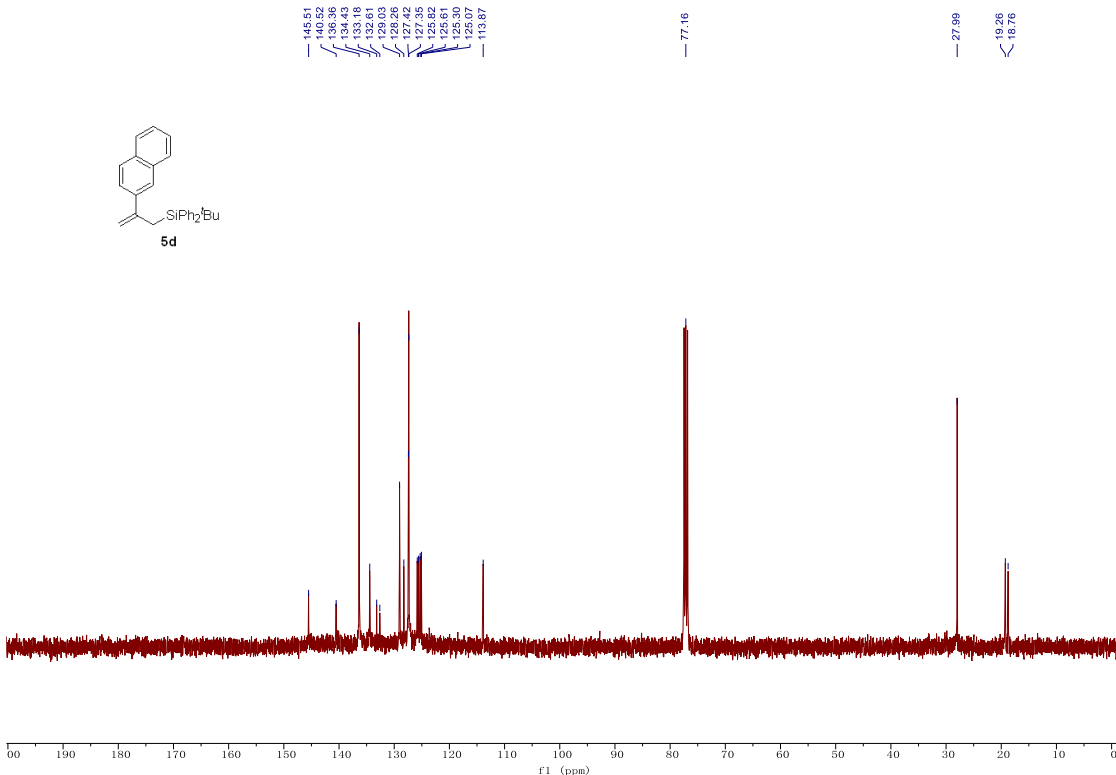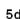

**5e;  $^1\text{H}$  NMR (400 MHz,  $\text{CDCl}_3$ );  $^{13}\text{C}$  NMR (100 MHz,  $\text{CDCl}_3$ )**

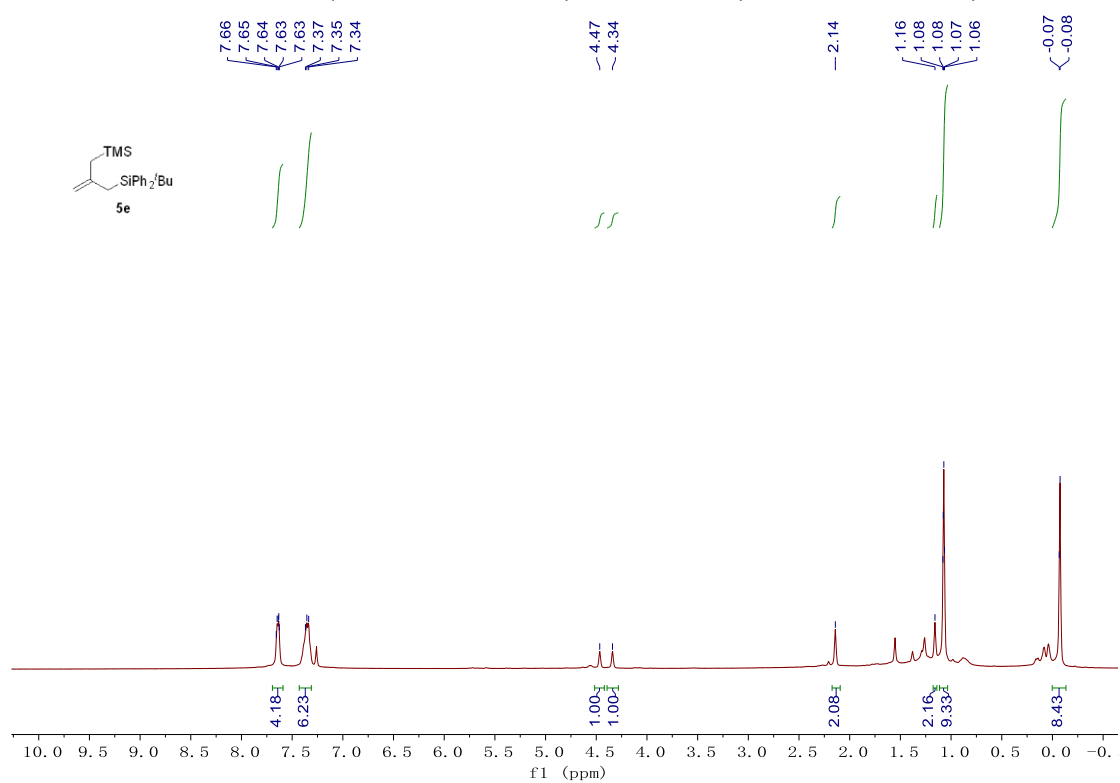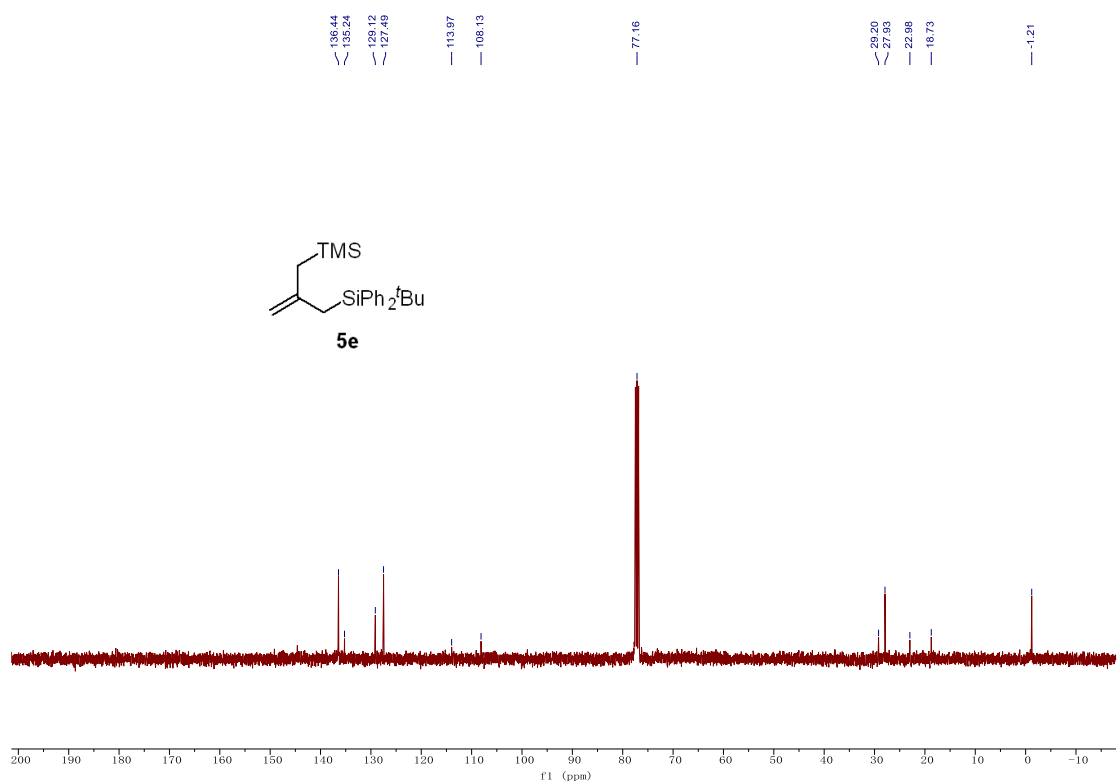

**5f;  $^1\text{H}$  NMR (400 MHz,  $\text{CDCl}_3$ );  $^{13}\text{C}$  NMR (100 MHz,  $\text{CDCl}_3$ )**

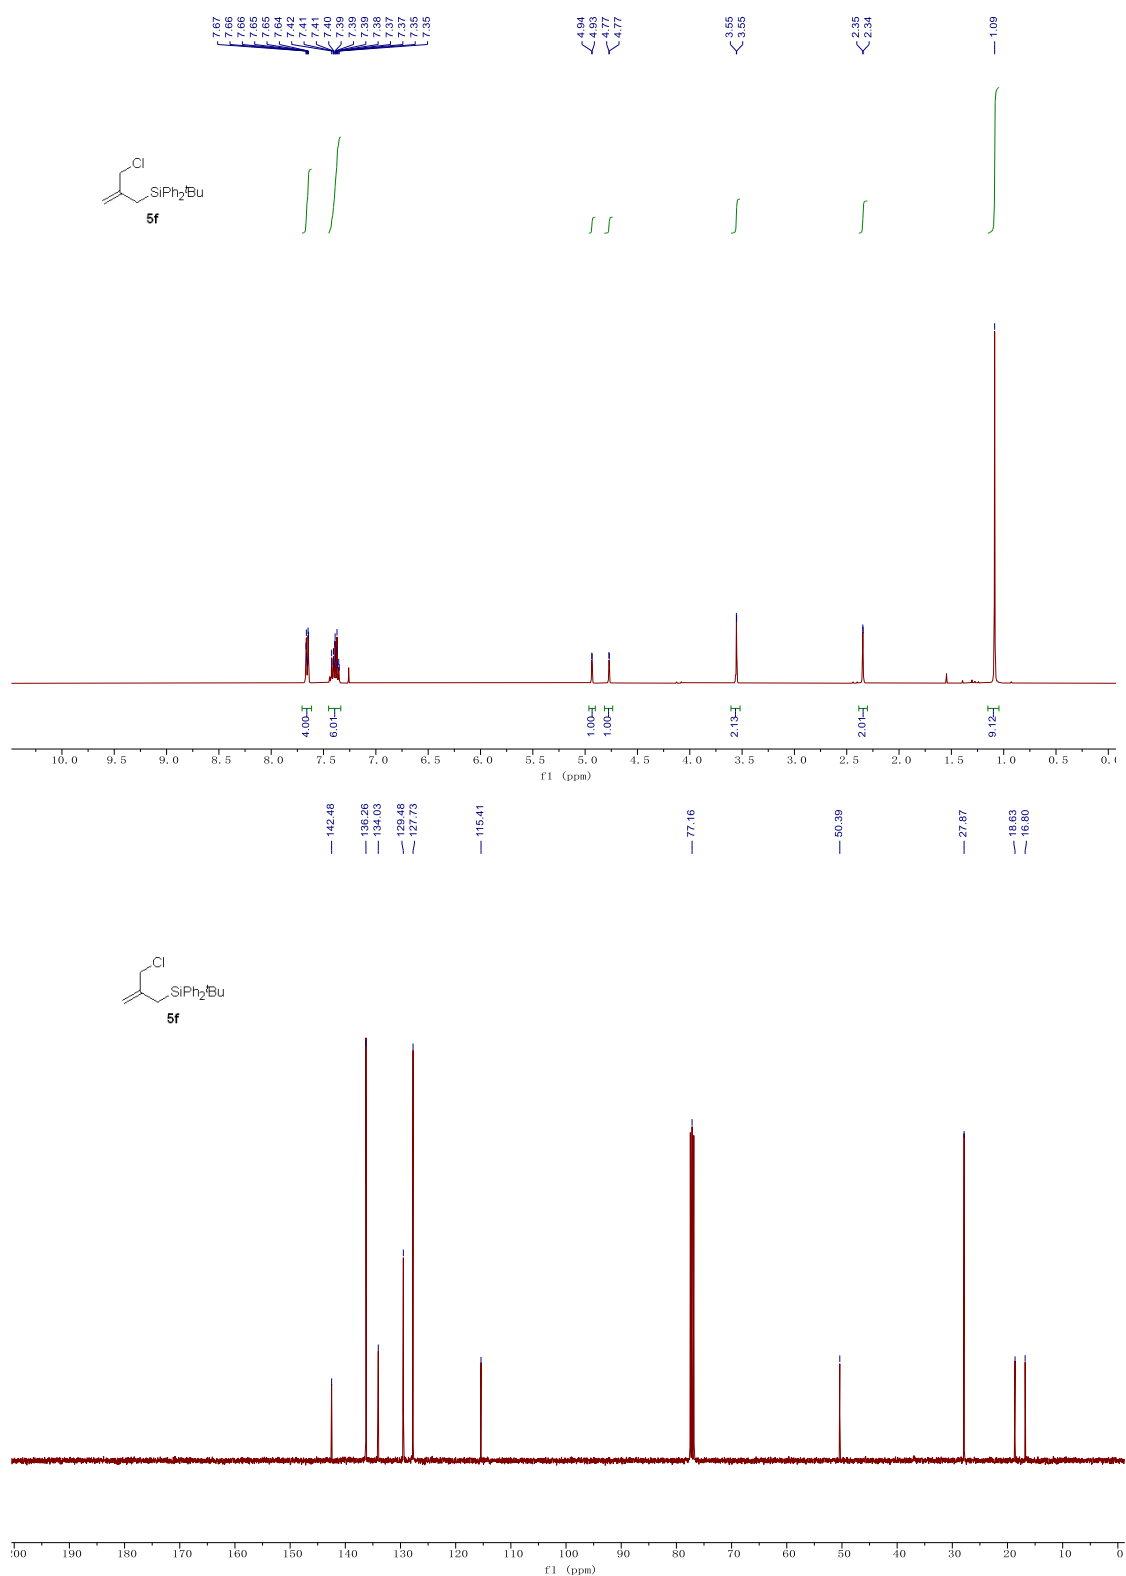

**6; <sup>1</sup>H NMR (400 MHz, CDCl<sub>3</sub>); <sup>13</sup>C NMR (100 MHz, CDCl<sub>3</sub>)**

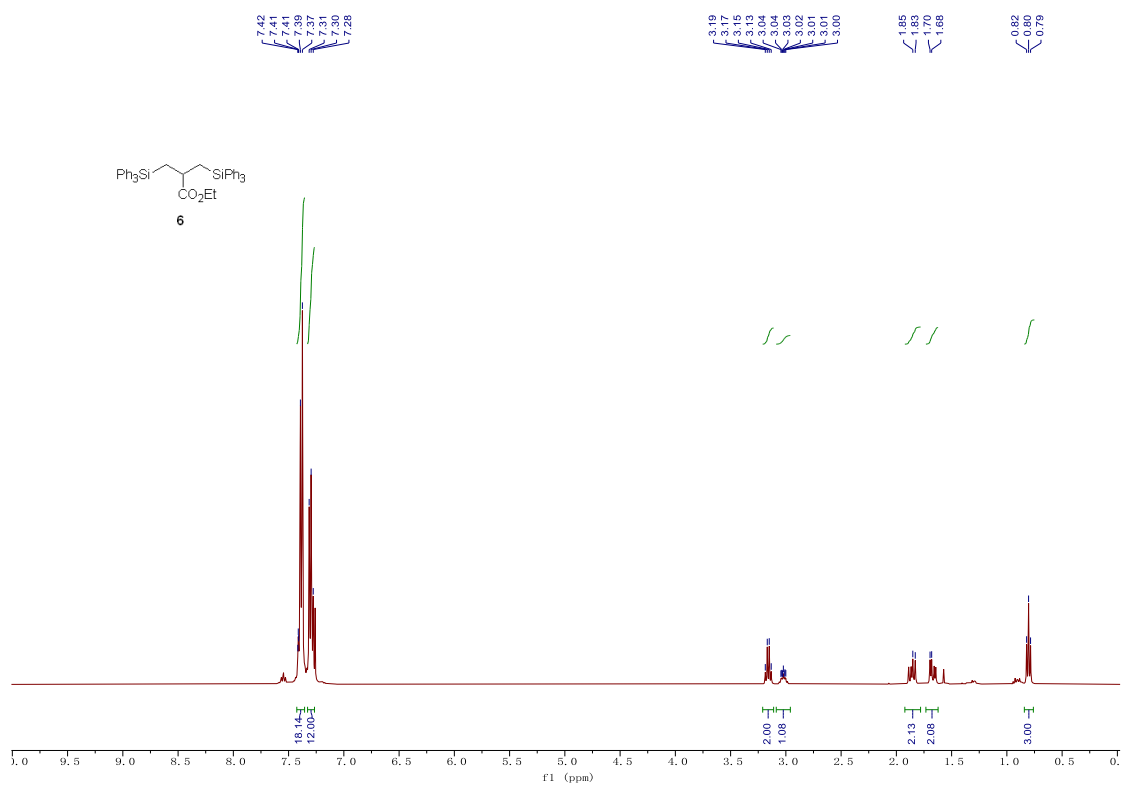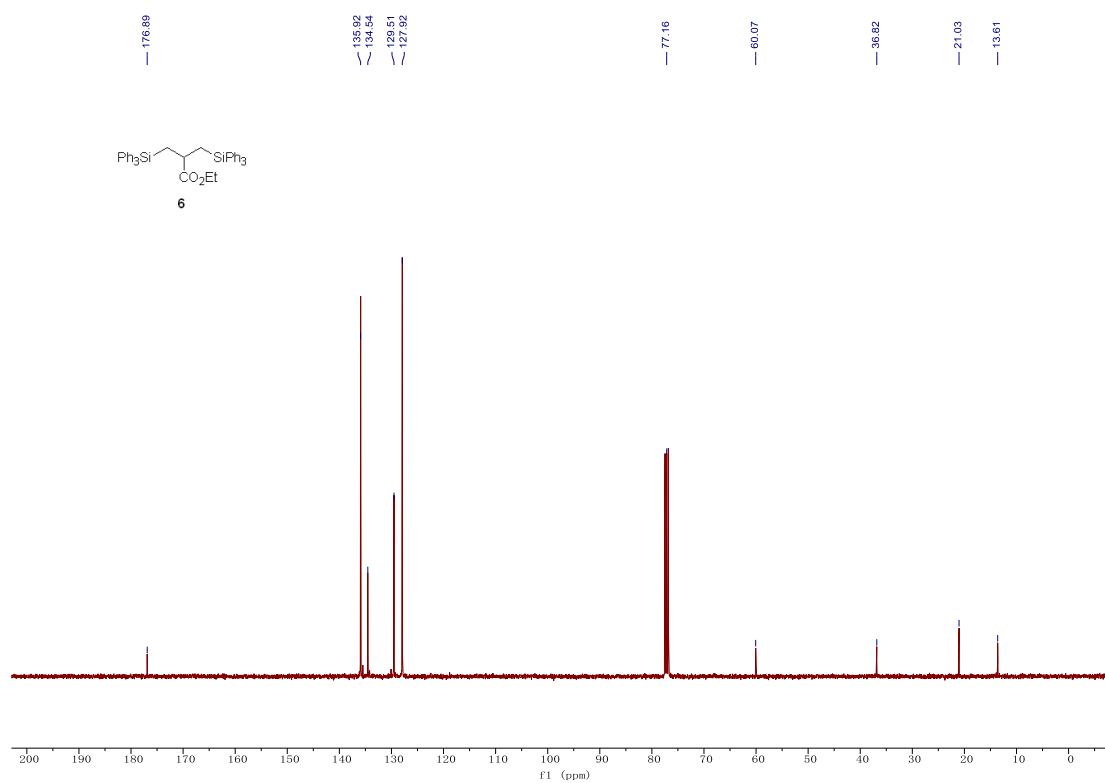

7;  $^1\text{H}$  NMR (400 MHz,  $\text{CDCl}_3$ );  $^{13}\text{C}$  NMR (100 MHz,  $\text{CDCl}_3$ )

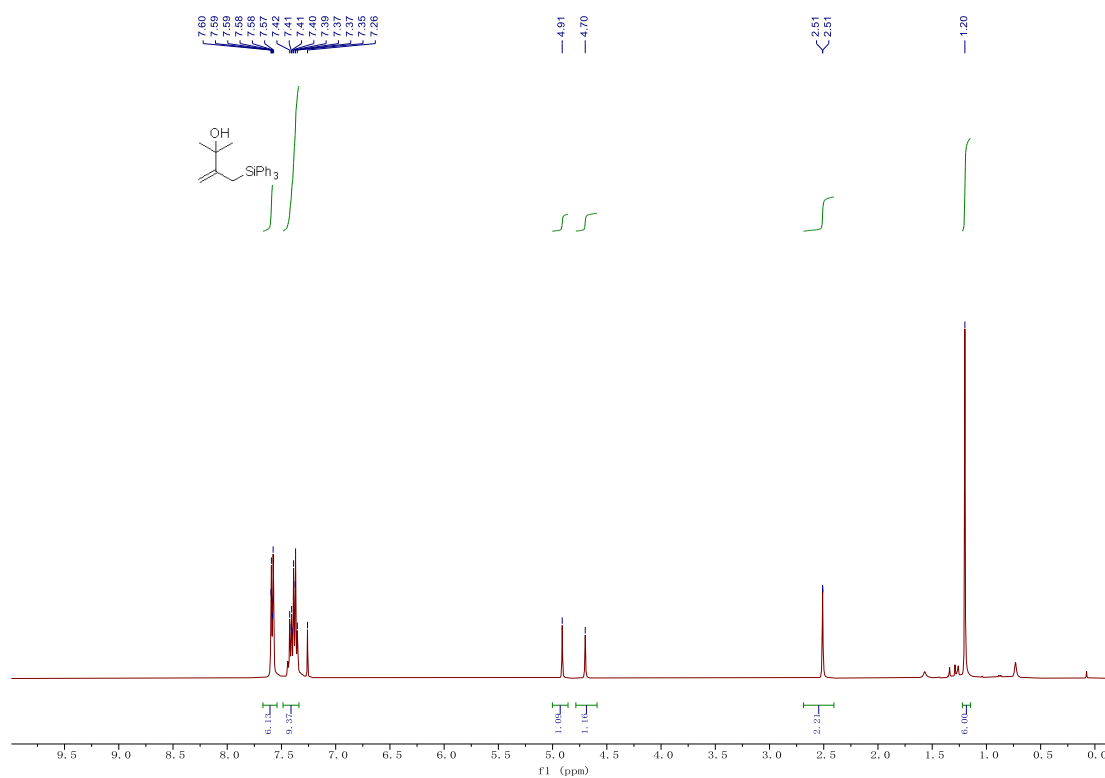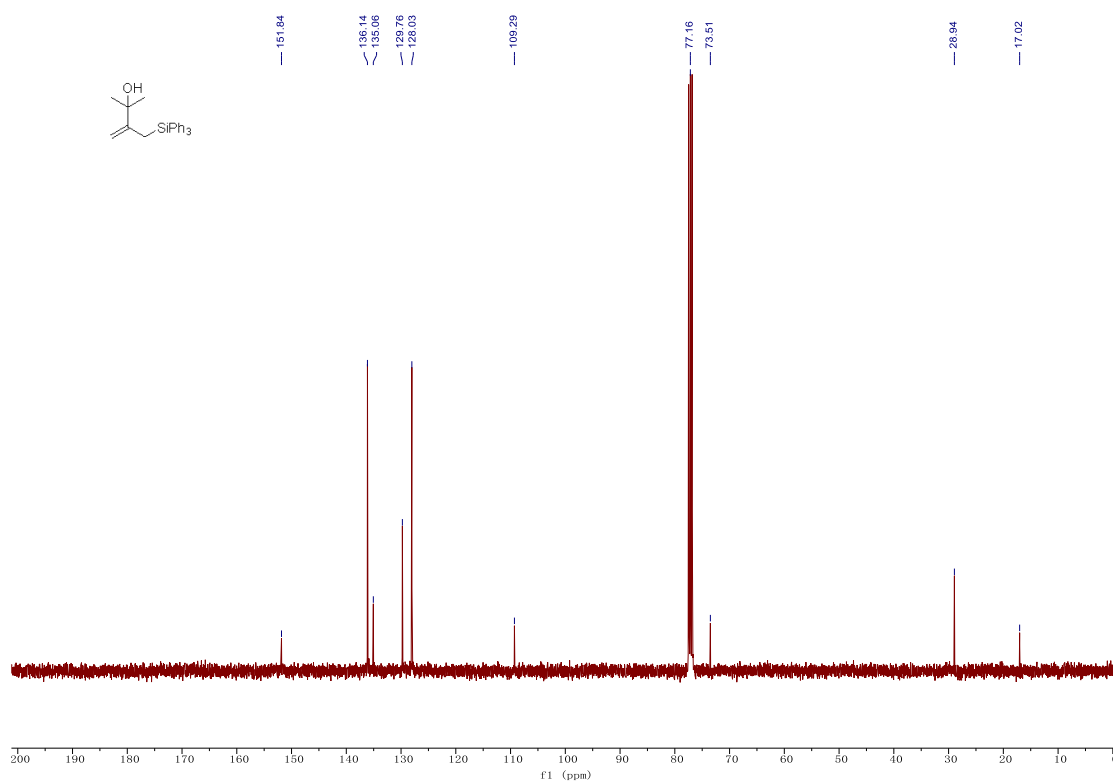

**8;  $^1\text{H}$  NMR (400 MHz,  $\text{CDCl}_3$ );  $^{13}\text{C}$  NMR (100 MHz,  $\text{CDCl}_3$ )**

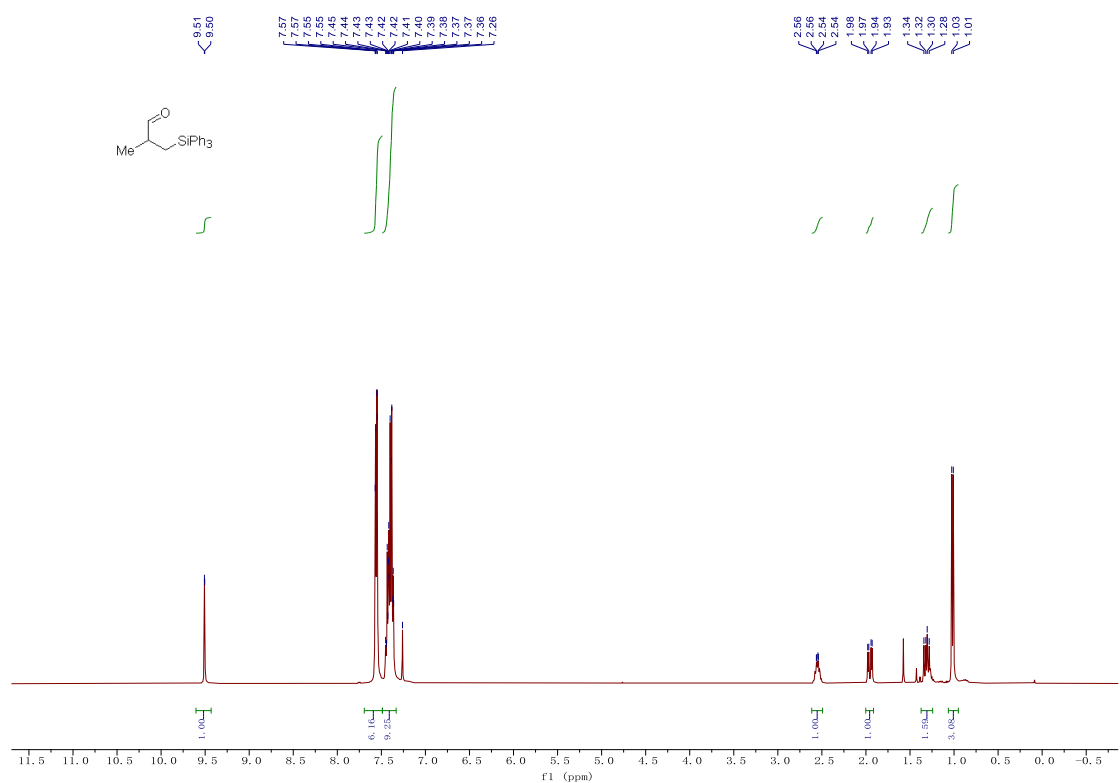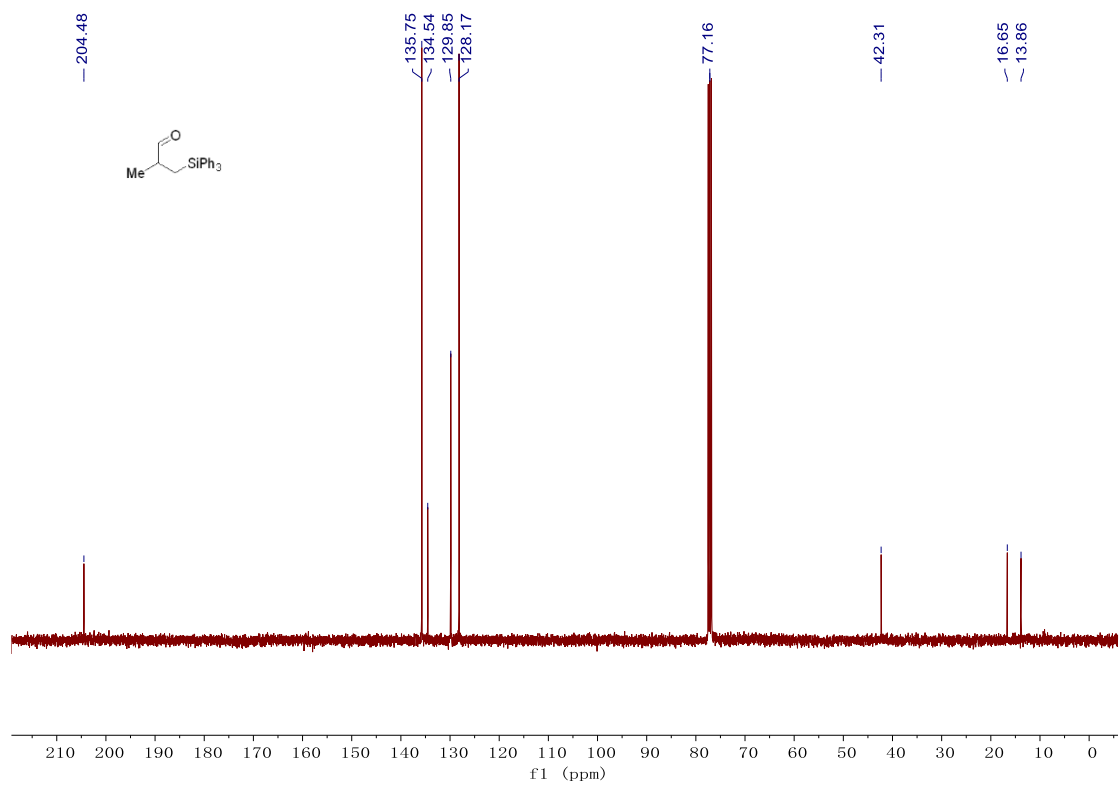

## Crystal data of **3m**

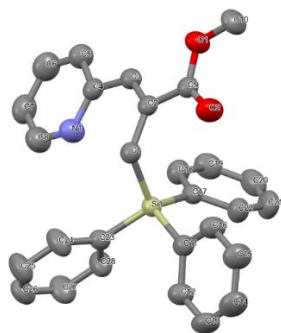

**Table 1** Crystal data and structure refinement for mo230226a.

|                                             |                                                                |
|---------------------------------------------|----------------------------------------------------------------|
| Identification code                         | mo230226a                                                      |
| Empirical formula                           | C <sub>28</sub> H <sub>25</sub> NO <sub>2</sub> Si             |
| Formula weight                              | 435.58                                                         |
| Temperature/K                               | 296.15                                                         |
| Crystal system                              | triclinic                                                      |
| Space group                                 | P-1                                                            |
| a/Å                                         | 8.2953(17)                                                     |
| b/Å                                         | 11.112(2)                                                      |
| c/Å                                         | 13.432(3)                                                      |
| $\alpha$ /°                                 | 75.647(4)                                                      |
| $\beta$ /°                                  | 76.178(4)                                                      |
| $\gamma$ /°                                 | 86.139(4)                                                      |
| Volume/Å <sup>3</sup>                       | 1164.7(4)                                                      |
| Z                                           | 2                                                              |
| $\rho_{\text{calc}}/\text{cm}^3$            | 1.242                                                          |
| $\mu/\text{mm}^{-1}$                        | 0.126                                                          |
| F(000)                                      | 460.0                                                          |
| Crystal size/mm <sup>3</sup>                | 0.15 × 0.15 × 0.12                                             |
| Radiation                                   | MoK $\alpha$ ( $\lambda$ = 0.71073)                            |
| 2 $\theta$ range for data collection/°      | 3.216 to 61.05                                                 |
| Index ranges                                | -9 ≤ h ≤ 11, -15 ≤ k ≤ 15, -18 ≤ l ≤ 19                        |
| Reflections collected                       | 24067                                                          |
| Independent reflections                     | 6555 [ $R_{\text{int}}$ = 0.0293, $R_{\text{sigma}}$ = 0.0313] |
| Data/restraints/parameters                  | 6555/0/290                                                     |
| Goodness-of-fit on F <sup>2</sup>           | 1.029                                                          |
| Final R indexes [ $I \geq 2\sigma(I)$ ]     | $R_1$ = 0.0447, $wR_2$ = 0.1062                                |
| Final R indexes [all data]                  | $R_1$ = 0.0715, $wR_2$ = 0.1203                                |
| Largest diff. peak/hole / e Å <sup>-3</sup> | 0.25/-0.22                                                     |
